# Supplementary material for: Growth of lung cancer cells in three-dimensional microenvironments reveals key features of tumor malignancy
Source: Royal Society of Chemistry journal article supplement (doi:10.1039/c1ib00090j), 2011-11-17
Supplement: c1ib00090j.pdf [file c1ib00090j.pdf]

Supplemental Figure 1. Proliferation status of lung cancer cell lines in 3D IrECM.

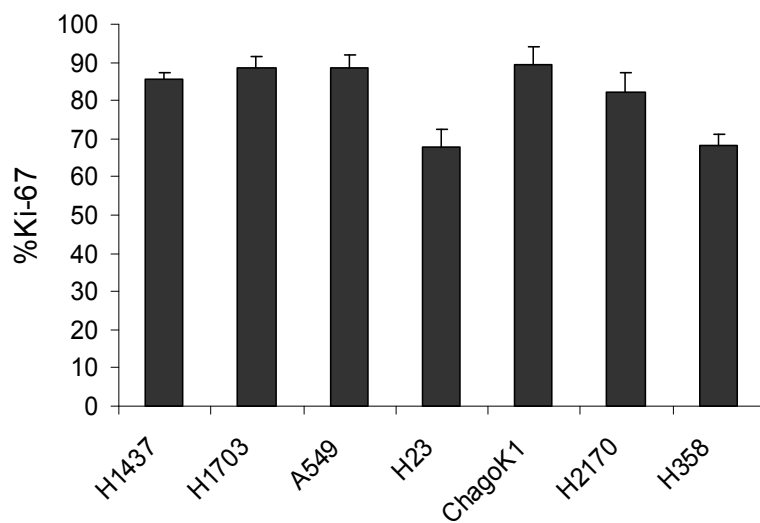

**Supplemental Figure 1. Proliferation status of lung cancer cell lines in 3D IrECM.**

Lung cancer cell lines cultured in 3D IrECM for 5 d were analyzed for expression of Ki67 by immunofluorescence. Results represent means $\pm$ SEM for three independent samples.

## Supplemental Figure 2. Meta-analysis of transcripts differentially expressed between lung cancer cells grown in 2D and 3D.

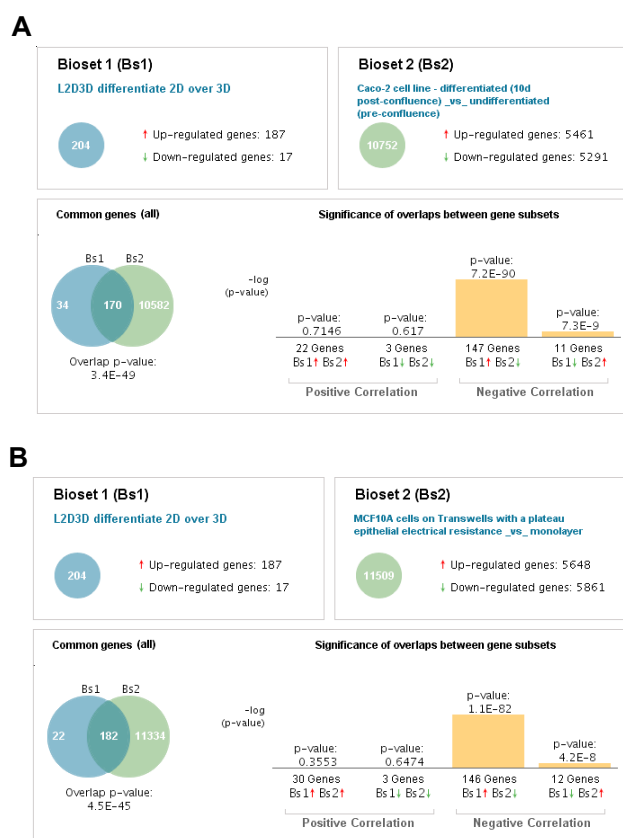

**Supplemental Figure 2. Meta-analysis of transcripts differentially expressed between lung cancer cells grown in 2D and 3D.** In each panel, Bioset #1 contains the 228 transcripts (representing 204 known genes) significantly differentially expressed ( $p < 0.05$ , ANOVA) between lung cancer cell lines grown on tissue culture plastic (2D) or in 3D IrECM (3D), in which the “Up-regulated” gene set showed increased expression in 2D relative to 3D, while the “Down-regulated genes” showed increased expression in 3D relative to 2D. Bioset #1 showed significant overlap ( $p = 3.4e-49$ ) and was anticorrelated with a gene set in which differentiated Caco-2 cells were compared to undifferentiated Caco-2 cells (A) and significant overlap ( $p = 4.5e-45$ ) and was anticorrelated with a gene set in which differentiated MCF10A cells were compared with undifferentiated MCF10A cells.

### Supplemental Figure 3. Meta-analysis of transcripts differentially expressed between lung cancer cell lines showing smooth or branching morphology.

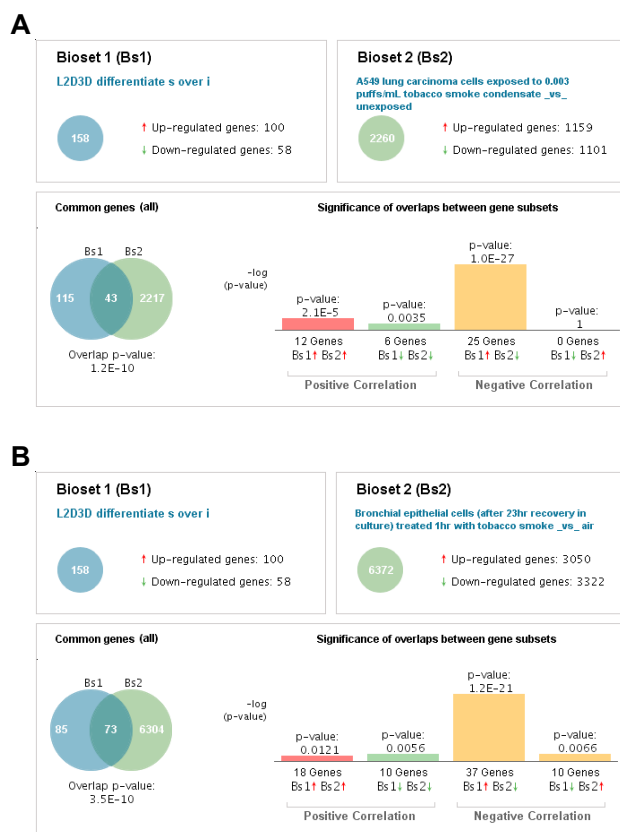

**Supplemental Figure 3. Meta-analysis of transcripts differentially expressed between lung cancer cell lines showing smooth or branching morphology.** In each panel, Bioset #1 contains the 200 transcripts (representing 204 known genes) significantly differentially expressed ( $p < 1e-05$ , ANOVA) between lung cancer cell lines showing smooth or branching morphology when grown in 3D IrECM, in which the “Up-regulated” gene set showed increased expression in smooth cell lines as compared to branching cell lines, while the “Down-regulated genes” showed increased expression in branching cell lines relative to smooth cell lines. Bioset #1 showed significant overlap ( $p = 1.2e-10$ ) and anticorrelation with a gene set in which A549 lung carcinoma cells were exposed to tobacco smoke condensate vs unexposed (A) and significant overlap ( $p = 3.5e-10$ ) and anticorrelation with a gene set in which isolated bronchial epithelial cells were exposed to tobacco smoke vs air (B).

Supplemental Figure 4. Association of individual transcripts in the 20-transcript set with survival in patients with lung adenocarcinoma.

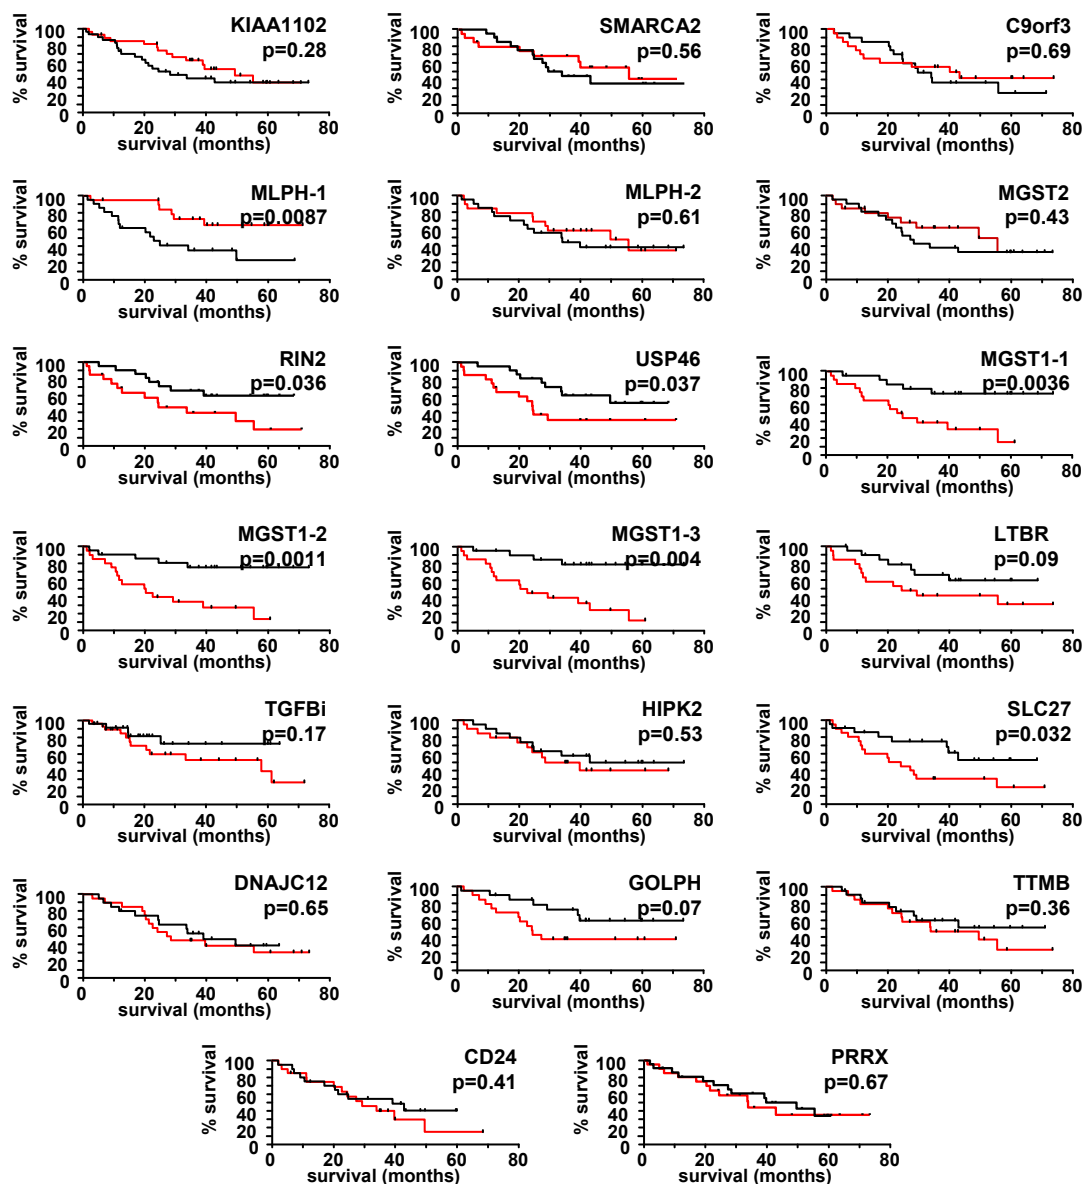

**Supplemental Figure 4. Association of individual transcripts in the 20-transcript set with survival in 59 patients with lung adenocarcinoma.** Kaplan-Meier plots of individual genes of the 20-gene signature showing differences in disease-free survival. Patients were divided into two equally sized groups based upon gene expression (low gene expression, black line; high gene expression, red line).

Supplemental Figure 5. Distribution of cancer stage assignment within patient groups.

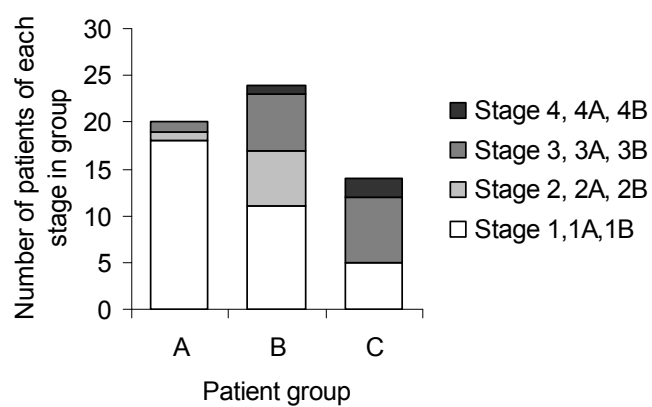

**Supplemental Figure 5. Distribution of cancer stage assignment within patient groups.**  
Clinical cancer stage information for each patient in the Duke adenocarcinoma data set graphed for each group.

Supplemental Table 1: 228 transcripts significantly differentially expressed ( $p < 0.05$ , ANOVA) between lung cancer cell lines grown on tissue culture plastic (2D) and in 3D IrECM (3D)

| Gene Symbol     | Description                                                               | Affymetrix probe ID | average expression in 2D/average expression in 3D | p-value  |
|-----------------|---------------------------------------------------------------------------|---------------------|---------------------------------------------------|----------|
| SERPINB6        | Serpin peptidase inhibitor, clade B (ovalbumin), member 6                 | 231628_s_at         | 0.010428867                                       | 3.20E-11 |
| MIDN            | midnolin                                                                  | 225954_s_at         | 0.235220079                                       | 0.000304 |
| DF              | D component of complement (adipsin)                                       | 205382_s_at         | 0.318410953                                       | 0.0115   |
| SPAG4           | sperm associated antigen 4                                                | 219888_at           | 0.327814538                                       | 0.00365  |
| BNIP3           | BCL2/adenovirus E1B 19kDa interacting protein 3                           | 201848_s_at         | 0.377144413                                       | 0.0178   |
| LOC401152       | HCV F-transactivated protein 1                                            | 224604_at           | 0.379857695                                       | 0.023    |
| BNIP3           | BCL2/adenovirus E1B 19kDa interacting protein 3                           | 201849_at           | 0.414313529                                       | 0.0166   |
| RAB11A          | RAB11A, member RAS oncogene family                                        | 234998_at           | 0.440022181                                       | 0.0154   |
| CA11            | carbonic anhydrase XI                                                     | 209726_at           | 0.448149786                                       | 0.0168   |
|                 | CDNA clone IMAGE:5262734                                                  | 228959_at           | 0.451228286                                       | 0.03     |
| E2IG5           | growth and transformation-dependent protein ; growth and transformati     | 224345_x_at         | 0.463079717                                       | 0.0178   |
| E2IG5           | growth and transformation-dependent protein                               | 223193_x_at         | 0.4643751                                         | 0.0195   |
| E2IG5           | growth and transformation-dependent protein                               | 220942_x_at         | 0.481163318                                       | 0.018    |
|                 | Transcribed locus                                                         | 235611_at           | 0.510025494                                       | 0.00365  |
| RBM12           | RNA binding motif protein 12                                              | 212170_at           | 0.514441563                                       | 0.0116   |
| HSPA5           | heat shock 70kDa protein 5 (glucose-regulated protein, 78kDa)             | 230031_at           | 0.533775959                                       | 0.0132   |
| LOC153222       | adult retina protein                                                      | 225956_at           | 0.534340876                                       | 0.012    |
| SLC30A1         | solute carrier family 30 (zinc transporter), member 1                     | 228181_at           | 0.551045356                                       | 0.0387   |
| PRO0149         | PRO0149 protein                                                           | 225197_at           | 0.597807363                                       | 0.0204   |
| MSI2            | Musashi homolog 2 (Drosophila)                                            | 226134_s_at         | 0.650543791                                       | 0.0234   |
| ARID4B          | AT rich interactive domain 4B (RBP1-like)                                 | 223111_x_at         | 1.176494994                                       | 0.044    |
| ANAPC2          | anaphase promoting complex subunit 2                                      | 218555_at           | 1.180256927                                       | 0.028    |
| SUV39H1         | suppressor of variegation 3-9 homolog 1 (Drosophila)                      | 218619_s_at         | 1.243294832                                       | 0.0312   |
| SNRPD3          | small nuclear ribonucleoprotein D3 polypeptide 18kDa                      | 202567_at           | 1.261067901                                       | 0.0296   |
| NFATC3          | nuclear factor of activated T-cells, cytoplasmic, calcineurin-dependent 2 | 210555_s_at         | 1.285651819                                       | 0.0432   |
| ZNF295          | zinc finger protein 295                                                   | 233952_s_at         | 1.305471351                                       | 0.00908  |
| BOLA2           | bolA-like 2 (E. coli)                                                     | 209836_x_at         | 1.307337321                                       | 0.0344   |
| LOC133619       | hypothetical protein MGC12103                                             | 221734_at           | 1.310465037                                       | 0.0234   |
| CBX5            | Chromobox homolog 5 (HP1 alpha homolog, Drosophila)                       | 212126_at           | 1.313315621                                       | 0.0302   |
| SRGAP2          | SLIT-ROBO Rho GTPase activating protein 2                                 | 232095_at           | 1.334641665                                       | 0.0271   |
| PSMD1           | proteasome (prosome, macropain) 26S subunit, non-ATPase, 1                | 201198_s_at         | 1.344201383                                       | 0.0344   |
|                 | Similar to KIAA0160 gene product is novel                                 | 217704_x_at         | 1.347602604                                       | 0.042    |
| UGCGL1          | UDP-glucose ceramide glucosyltransferase-like 1                           | 222569_at           | 1.353295684                                       | 0.0159   |
| LUC7L2          | LUC7-like 2 (S. cerevisiae)                                               | 243852_at           | 1.367044333                                       | 0.0211   |
| ARHGAP11A       | Rho GTPase activating protein 11A                                         | 204492_at           | 1.368609514                                       | 0.0132   |
| ORC6L           | origin recognition complex, subunit 6 homolog-like (yeast)                | 219105_x_at         | 1.376539354                                       | 0.0123   |
| KIAA1271        | KIAA1271 protein                                                          | 231829_at           | 1.387244155                                       | 0.0371   |
| PTPN11          | protein tyrosine phosphatase, non-receptor type 11 (Noonan syndrome)      | 209895_at           | 1.388783884                                       | 0.0125   |
| BLM             | Bloom syndrome                                                            | 205733_at           | 1.389806409                                       | 0.0249   |
| MTHFD1          | methylenetetrahydrofolate dehydrogenase (NADP+ dependent) 1, meth         | 202309_at           | 1.393148256                                       | 0.0249   |
| DDX18           | DEAD (Asp-Glu-Ala-Asp) box polypeptide 18                                 | 208897_s_at         | 1.399347812                                       | 0.0132   |
| C14orf156       | chromosome 14 open reading frame 156 ; chromosome 14 open readin          | 221434_s_at         | 1.400943471                                       | 0.0151   |
| FLJ20516        | timeless-interacting protein                                              | 219258_at           | 1.405340426                                       | 0.00516  |
| SFRS2IP         | splicing factor, arginine/serine-rich 2, interacting protein              | 213850_s_at         | 1.408180017                                       | 0.00773  |
| CDKN3           | cyclin-dependent kinase inhibitor 3 (CDK2-associated dual specificity p   | 209714_s_at         | 1.416589372                                       | 0.00603  |
| UGCGL1          | UDP-glucose ceramide glucosyltransferase-like 1                           | 218257_s_at         | 1.416942363                                       | 0.0444   |
| PTPN11          | protein tyrosine phosphatase, non-receptor type 11 (Noonan syndrome)      | 209896_s_at         | 1.421731732                                       | 0.00693  |
| FLJ11301        | hypothetical protein FLJ11301                                             | 223200_s_at         | 1.427365747                                       | 0.0129   |
| MAP4K4          | mitogen-activated protein kinase kinase kinase kinase 4                   | 206571_s_at         | 1.428781442                                       | 0.00974  |
| GART            | phosphoribosylglycinamide formyltransferase, phosphoribosylglyciami       | 212378_at           | 1.429538657                                       | 0.016    |
| BANP            | BTG3 associated nuclear protein                                           | 219966_x_at         | 1.435121296                                       | 0.0242   |
| E2F7            | E2F transcription factor 7                                                | 228033_at           | 1.43727263                                        | 0.0382   |
| PRC1            | protein regulator of cytokinesis 1                                        | 218009_s_at         | 1.439382956                                       | 0.00974  |
| RAD54B          | RAD54 homolog B (S. cerevisiae)                                           | 219494_at           | 1.447694949                                       | 0.0387   |
| FLJ20718        | hypothetical protein FLJ20718                                             | 219289_at           | 1.451313625                                       | 0.0131   |
| ARS2            | arsenate resistance protein ARS2                                          | 201679_at           | 1.459184304                                       | 0.0131   |
| NUP93           | nucleoporin 93kDa                                                         | 202188_at           | 1.467462804                                       | 0.00782  |
| POLE2           | polymerase (DNA directed), epsilon 2 (p59 subunit)                        | 205909_at           | 1.475822965                                       | 0.00577  |
|                 | CDNA FLJ30026 fis, clone 3NB692001123                                     | 1560048_at          | 1.476469282                                       | 0.0344   |
| CLTB            | clathrin, light polypeptide (Lcb)                                         | 205172_x_at         | 1.47839951                                        | 0.0284   |
| CLTB            | clathrin, light polypeptide (Lcb)                                         | 206284_x_at         | 1.478848601                                       | 0.0225   |
| BRCA1           | breast cancer 1, early onset                                              | 204531_s_at         | 1.480330563                                       | 0.0178   |
| C15orf25        | chromosome 15 open reading frame 25                                       | 229181_s_at         | 1.481627586                                       | 0.00154  |
| BANP            | BTG3 associated nuclear protein                                           | 228928_x_at         | 1.482231725                                       | 0.00802  |
| DDX18           | DEAD (Asp-Glu-Ala-Asp) box polypeptide 18                                 | 205763_s_at         | 1.482458931                                       | 0.0205   |
| ATM             | ataxia telangiectasia mutated (includes complementation groups A, C a     | 208442_s_at         | 1.483519036                                       | 0.0411   |
| CGI-96 ; dJ222E | CGI-96 protein ; similar to CGI-96                                        | 214828_s_at         | 1.484956259                                       | 0.0413   |
| KIAA1731        | KIAA1731                                                                  | 1569302_at          | 1.486277482                                       | 0.0186   |
| FBXL18          | F-box and leucine-rich repeat protein 18                                  | 215068_s_at         | 1.488187618                                       | 0.0132   |
| SDCCAG1         | serologically defined colon cancer antigen 1                              | 1557950_at          | 1.489962851                                       | 0.00723  |
| PKMYT1          | protein kinase, membrane associated tyrosine/threonine 1                  | 204267_x_at         | 1.493546262                                       | 0.00669  |
| C14orf145       | chromosome 14 open reading frame 145                                      | 244033_at           | 1.494029645                                       | 0.0038   |
| CNOT1           | CCR4-NOT transcription complex, subunit 1                                 | 1554052_at          | 1.495147687                                       | 0.0249   |
| SFRS12          | splicing factor, arginine/serine-rich 12                                  | 244287_at           | 1.495696224                                       | 0.000504 |
| LOC400506       | similar to TSG118.1                                                       | 213235_at           | 1.502716733                                       | 0.015    |
| BICD2           | bicaudal D homolog 2 (Drosophila)                                         | 209203_s_at         | 1.508318439                                       | 0.0166   |
| CLTB            | clathrin, light polypeptide (Lcb) ; clathrin, light polypeptide (Lcb)     | 211043_s_at         | 1.512815594                                       | 0.0262   |
| ZNF294          | zinc finger protein 294                                                   | 233819_s_at         | 1.515650122                                       | 0.0178   |
| DLEU1           | deleted in lymphocytic leukemia, 1                                        | 205677_s_at         | 1.526710333                                       | 0.0358   |
| WDHD1           | WD repeat and HMG-box DNA binding protein 1                               | 216228_s_at         | 1.52740861                                        | 0.0228   |

|                                                                                                   |                                                                          |              |             |          |
|---------------------------------------------------------------------------------------------------|--------------------------------------------------------------------------|--------------|-------------|----------|
| GART                                                                                              | phosphoribosylglycinamide formyltransferase, phosphoribosylglycinami     | 217445_s_at  | 1.528661275 | 0.00274  |
| PX19                                                                                              | px19-like protein                                                        | 224232_s_at  | 1.535687178 | 0.0444   |
| FLJ10719                                                                                          | hypothetical protein FLJ10719                                            | 223785_at    | 1.537739469 | 0.015    |
|                                                                                                   |                                                                          | 222606_at    | 1.537937837 | 0.000828 |
| CSE1L                                                                                             | CSE1 chromosome segregation 1-like (yeast)                               | 201111_at    | 1.538939263 | 0.0168   |
| PPIL5                                                                                             | peptidylprolyl isomerase (cyclophilin)-like 5                            | 235113_at    | 1.544682535 | 0.0264   |
| TCOF1                                                                                             | Treacher Collins-Franceschetti syndrome 1                                | 202384_s_at  | 1.545723589 | 0.0234   |
| NAP1L4                                                                                            | nucleosome assembly protein 1-like 4                                     | 1560339_s_at | 1.555883811 | 0.00297  |
| FLJ37562                                                                                          | hypothetical protein FLJ37562                                            | 1553107_s_at | 1.559768238 | 0.00782  |
| FLJ30656                                                                                          | hypothetical protein FLJ30656                                            | 212529_at    | 1.560709815 | 0.0178   |
| FLJ25416                                                                                          | hypothetical protein FLJ25416                                            | 228281_at    | 1.560861767 | 0.00266  |
| NUPL1                                                                                             | Nucleoporin like 1                                                       | 241425_at    | 1.564229569 | 0.0228   |
| FAM72A                                                                                            | family with sequence similarity 72, member A                             | 225834_at    | 1.566688586 | 0.00773  |
| NUCKS1                                                                                            | nuclear casein kinase and cyclin-dependent kinase substrate 1            | 229353_s_at  | 1.567990041 | 0.00444  |
| MDM4                                                                                              | Mdm4, transformed 3T3 cell double minute 4, p53 binding protein (mou     | 225742_at    | 1.571595706 | 0.0264   |
| MTA1                                                                                              | metastasis associated 1                                                  | 202247_s_at  | 1.576083635 | 0.00365  |
| PCBP2                                                                                             | Poly(rC) binding protein 2                                               | 213517_at    | 1.577089121 | 0.0371   |
| GPAM                                                                                              | glycerol-3-phosphate acyltransferase, mitochondrial                      | 225420_at    | 1.580512879 | 0.0336   |
| GART                                                                                              | phosphoribosylglycinamide formyltransferase, phosphoribosylglycinami     | 212379_at    | 1.580529965 | 0.00577  |
| POLR3D                                                                                            | polymerase (RNA) III (DNA directed) polypeptide D, 44kDa                 | 208361_s_at  | 1.590747197 | 0.0262   |
| GAJ                                                                                               | GAJ protein                                                              | 223700_at    | 1.590867073 | 0.0432   |
| POLR3K                                                                                            | polymerase (RNA) III (DNA directed) polypeptide K, 12.3 kDa              | 218866_s_at  | 1.594473022 | 0.0228   |
| RANBP1                                                                                            | RAN binding protein 1                                                    | 202483_s_at  | 1.602862253 | 0.00616  |
| TMPO                                                                                              | thymopoietin                                                             | 203432_at    | 1.610908432 | 0.0125   |
| HSPCA                                                                                             | heat shock 90kDa protein 1, alpha                                        | 211968_s_at  | 1.612744553 | 0.00297  |
| HOMER3                                                                                            | homer homolog 3 (Drosophila)                                             | 215489_x_at  | 1.613677782 | 0.0239   |
| GLE1L                                                                                             | GLE1 RNA export mediator-like (yeast)                                    | 206920_s_at  | 1.613890062 | 0.0125   |
| UHMK1                                                                                             | U2AF homology motif (UHM) kinase 1                                       | 227740_at    | 1.615608756 | 0.0307   |
| NCBP1                                                                                             | nuclear cap binding protein subunit 1, 80kDa                             | 209520_s_at  | 1.619005921 | 0.0218   |
| UHMK1                                                                                             | U2AF homology motif (UHM) kinase 1                                       | 235003_at    | 1.627165982 | 0.0371   |
| NUCKS1                                                                                            | nuclear casein kinase and cyclin-dependent kinase substrate 1            | 222424_s_at  | 1.627556106 | 0.0161   |
| ATAD3B                                                                                            | ATPase family, AAA domain containing 3B                                  | 223617_x_at  | 1.62845103  | 0.042    |
| PRIM1                                                                                             | primase, polypeptide 1, 49kDa                                            | 205053_at    | 1.629674571 | 0.0228   |
| CPSF2                                                                                             | cleavage and polyadenylation specific factor 2, 100kDa                   | 233208_x_at  | 1.631434986 | 0.00159  |
| CHEK1                                                                                             | CHK1 checkpoint homolog (S. pombe)                                       | 205393_s_at  | 1.63429277  | 0.0474   |
| DKFZp547G183                                                                                      | hypothetical protein DKFZp547G183                                        | 220572_at    | 1.642141504 | 0.00723  |
| IQGAP1                                                                                            | IQ motif containing GTPase activating protein 1                          | 213446_s_at  | 1.642304459 | 0.00186  |
|                                                                                                   | CDNA clone IMAGE:6043059                                                 | 228559_at    | 1.645866327 | 0.00272  |
| CYCS                                                                                              | cytochrome c, somatic                                                    | 244546_at    | 1.647678111 | 0.0368   |
| KIF22                                                                                             | kinesin family member 22                                                 | 216969_s_at  | 1.652209433 | 0.00274  |
| SNRPF                                                                                             | small nuclear ribonucleoprotein polypeptide F                            | 203832_at    | 1.655795734 | 0.0133   |
| SRPRB                                                                                             | signal recognition particle receptor, B subunit                          | 222532_at    | 1.655957499 | 0.0125   |
| CSPG6                                                                                             | chondroitin sulfate proteoglycan 6 (bamacan)                             | 209257_s_at  | 1.657434773 | 0.00266  |
| TIMM44                                                                                            | translocase of inner mitochondrial membrane 44 homolog (yeast)           | 203093_s_at  | 1.667989993 | 0.0307   |
| SMTN                                                                                              | smoothelin                                                               | 207390_s_at  | 1.669023917 | 0.0278   |
| TRIM14                                                                                            | tripartite motif-containing 14                                           | 203147_s_at  | 1.669123069 | 0.00583  |
| DTYMK                                                                                             | deoxythymidylate kinase (thymidylate kinase)                             | 203270_at    | 1.676734101 | 0.0101   |
| EWSR1                                                                                             | Ewing sarcoma breakpoint region 1                                        | 229666_at    | 1.676928935 | 0.00159  |
| BRCA1                                                                                             | breast cancer 1, early onset                                             | 211851_x_at  | 1.677300917 | 0.0113   |
| C1orf112                                                                                          | chromosome 1 open reading frame 112                                      | 220840_s_at  | 1.68062383  | 0.0472   |
| LOC23117 ; LOC KIAA0220-like protein ; hypothetical protein LOC440345 ; PI-3-kinase-n-231989_s_at |                                                                          | 240247_at    | 1.68697125  | 0.00219  |
| AHSA1                                                                                             | AHA1, activator of heat shock 90kDa protein ATPase homolog 1 (yeast)     | 201491_at    | 1.688231765 | 0.00723  |
| DKFZp547E087                                                                                      | hypothetical gene LOC283846                                              | 235060_at    | 1.692501919 | 0.00655  |
|                                                                                                   | Transcribed locus                                                        | 240247_at    | 1.693089016 | 0.00616  |
| BANP                                                                                              | BTG3 associated nuclear protein                                          | 233186_s_at  | 1.693531258 | 0.00304  |
| RSN                                                                                               | restin (Reed-Steinberg cell-expressed intermediate filament-associated   | 1558924_s_at | 1.695229878 | 0.0101   |
| MAZ                                                                                               | MYC-associated zinc finger protein (purine-binding transcription factor) | 207824_s_at  | 1.69602149  | 0.023    |
|                                                                                                   | CDNA clone IMAGE:3929520                                                 | 235134_at    | 1.701577718 | 0.0211   |
| MALAT1                                                                                            | metastasis associated lung adenocarcinoma transcript 1 (non-coding R     | 226675_s_at  | 1.703934696 | 0.0168   |
| ZWILCH                                                                                            | Zwilch, kinetochore associated, homolog (Drosophila)                     | 218349_s_at  | 1.707235347 | 0.00051  |
| CDC45L                                                                                            | CDC45 cell division cycle 45-like (S. cerevisiae)                        | 204126_s_at  | 1.711229768 | 0.0387   |
| RFWD3                                                                                             | ring finger and WD repeat domain 3                                       | 218564_at    | 1.711283987 | 0.0226   |
| C20orf172                                                                                         | chromosome 20 open reading frame 172                                     | 219512_at    | 1.718093881 | 0.0317   |
| CEBPZ                                                                                             | CCAAT/enhancer binding protein zeta                                      | 231819_at    | 1.719184092 | 0.0125   |
| LIMS1                                                                                             | LIM and senescent cell antigen-like domains 1                            | 207198_s_at  | 1.727183846 | 0.00842  |
| LZIC                                                                                              | Leucine zipper and CTNBP1 domain containing                              | 226081_at    | 1.734752401 | 0.00384  |
| C9orf86                                                                                           | chromosome 9 open reading frame 86                                       | 225377_at    | 1.735983628 | 0.00264  |
| JUB                                                                                               | jub, ajuba homolog (Xenopus laevis)                                      | 225806_at    | 1.738368617 | 0.0274   |
| PPP1R10                                                                                           | protein phosphatase 1, regulatory subunit 10                             | 201703_s_at  | 1.742043837 | 0.00203  |
| MALAT1                                                                                            | metastasis associated lung adenocarcinoma transcript 1 (non-coding R     | 224567_x_at  | 1.753498038 | 0.00974  |
| PPID                                                                                              | peptidylprolyl isomerase D (cyclophilin D)                               | 204186_s_at  | 1.760919912 | 0.00773  |
| UBN1                                                                                              | ubiquitin 1                                                              | 209088_s_at  | 1.766555936 | 0.0133   |
| EPRS                                                                                              | glutamyl-prolyl-tRNA synthetase                                          | 200841_s_at  | 1.767000831 | 0.0302   |
| XRCC2                                                                                             | X-ray repair complementing defective repair in Chinese hamster cells 2   | 207598_x_at  | 1.771401553 | 0.00117  |
| ESCO2                                                                                             | establishment of cohesion 1 homolog 2 (S. cerevisiae)                    | 235588_at    | 1.776943204 | 0.00378  |
| CYP51A1                                                                                           | cytochrome P450, family 51, subfamily A, polypeptide 1                   | 216607_s_at  | 1.778417125 | 0.00583  |
|                                                                                                   | Transcribed locus                                                        | 241879_at    | 1.79065997  | 0.0258   |
| ZNF146                                                                                            | Zinc finger protein 146                                                  | 1569312_at   | 1.794103975 | 0.0274   |
| RAD51C                                                                                            | RAD51 homolog C (S. cerevisiae)                                          | 209849_s_at  | 1.800275666 | 0.00982  |
| RANGAP1                                                                                           | Ran GTPase activating protein 1                                          | 212125_at    | 1.803853782 | 0.0373   |
| HIST1H4C                                                                                          | histone 1, H4c                                                           | 205967_at    | 1.806753491 | 0.00187  |
| SPTBN1                                                                                            | spectrin, beta, non-erythrocytic 1                                       | 200672_x_at  | 1.808081753 | 0.0178   |
| PKN2                                                                                              | protein kinase N2                                                        | 212629_s_at  | 1.814840933 | 0.00987  |

|                |                                                                          |                  |             |          |
|----------------|--------------------------------------------------------------------------|------------------|-------------|----------|
| XPO7           | exportin 7                                                               | 208459_s_at      | 1.829446752 | 0.00383  |
| CDT1           | DNA replication factor                                                   | 209832_s_at      | 1.830792334 | 0.0123   |
| DKFZp547E087   | hypothetical gene LOC283846                                              | 235167_at        | 1.831030939 | 0.00424  |
| CDC6           | CDC6 cell division cycle 6 homolog (S. cerevisiae)                       | 203967_at        | 1.841135025 | 0.00916  |
| THRAP3         | thyroid hormone receptor associated protein 3                            | 222439_s_at      | 1.856528409 | 0.00162  |
| SMG1 ; LOC231  | PI-3-kinase-related kinase SMG-1 ; KIAA0220-like protein ; hypotheticala | 244766_at        | 1.857264184 | 0.00384  |
| KIAA1212       | KIAA1212                                                                 | 219387_at        | 1.880581571 | 0.0309   |
| PHF5A          | PHD finger protein 5A                                                    | 225309_at        | 1.884835552 | 0.00377  |
| C22orf18       | chromosome 22 open reading frame 18                                      | 218741_at        | 1.891124533 | 0.0189   |
| JUB            | jub, ajuba homolog (Xenopus laevis)                                      | 1553764_a_at     | 1.897567643 | 0.0216   |
| CSPG6          | chondroitin sulfate proteoglycan 6 (bamacan)                             | 209258_s_at      | 1.912786106 | 0.00159  |
| CHD4           | chromodomain helicase DNA binding protein 4                              | 201182_s_at      | 1.931718807 | 0.0067   |
|                | CDNA FLJ11381 fis, clone HEMBA1000501                                    | 227349_at        | 1.934825397 | 0.00893  |
| BAZ1B          | Bromodomain adjacent to zinc finger domain, 1B                           | 213336_at        | 1.936513215 | 0.00582  |
|                | CDNA FLJ14193 fis, clone NT2RP3001115                                    | 232569_at        | 1.944041119 | 0.000925 |
| SMCHD1         | structural maintenance of chromosomes flexible hinge domain containir    | 1558747_at       | 1.944204004 | 0.0125   |
| H2AFX          | H2A histone family, member X                                             | 212525_s_at      | 1.947110389 | 0.00304  |
| PSME4          | proteasome (prosome, macropain) activator subunit 4                      | 212220_at        | 1.958019045 | 0.00297  |
| DKFZP434A013   | DKFZp434A0131 protein                                                    | 235263_at        | 1.961496431 | 0.00741  |
| FSHPRH1        | FSH primary response (LRPR1 homolog, rat) 1                              | 207590_s_at      | 1.972466328 | 0.0299   |
| BPNT1          | 3'(2'), 5'-bisphosphate nucleotidase 1                                   | 1554575_a_at     | 1.994689549 | 0.0225   |
| Cep290         | centrosome protein cep290                                                | 221683_s_at      | 2.002488923 | 0.00227  |
| HSPH1          | heat shock 105kDa/110kDa protein 1                                       | 208744_x_at      | 2.006309952 | 0.00694  |
| PMS2 ; PMS2CL  | PMS2 postmeiotic segregation increased 2 (S. cerevisiae) ; PMS2-C te     | 209805_at        | 2.017477094 | 0.0162   |
|                | Similar to Formin binding protein 2 (srGAP2)                             | 228628_at        | 2.031738028 | 0.000322 |
| PLK1           | polo-like kinase 1 (Drosophila)                                          | 202240_at        | 2.073045166 | 0.00162  |
| GTSE1          | G-2 and S-phase expressed 1                                              | 204315_s_at      | 2.082457236 | 0.00846  |
| TOP1           | topoisomerase (DNA) I                                                    | 208900_s_at      | 2.127260183 | 0.0296   |
| KIAA0220       | Hypothetical protein LOC440345                                           | 238449_at        | 2.129871262 | 0.00154  |
| CHORDC1        | cysteine and histidine-rich domain (CHORD)-containing 1                  | 218566_s_at      | 2.140310604 | 0.0001   |
| BIRC5          | baculoviral IAP repeat-containing 5 (survivin)                           | 210334_x_at      | 2.151155922 | 0.0102   |
| C1orf43        | chromosome 1 open reading frame 43                                       | 1555225_at       | 2.162211254 | 0.0231   |
| SYNJ2BP        | Synaptojanin 2 binding protein                                           | 235722_at        | 2.178084173 | 0.00444  |
| FSHPRH1        | FSH primary response (LRPR1 homolog, rat) 1                              | 214804_at        | 2.197443656 | 0.00868  |
| WDR76          | WD repeat domain 76                                                      | 205519_at        | 2.212225379 | 0.0148   |
| ITM1           | integral membrane protein 1                                              | 202223_at        | 2.249964358 | 0.00305  |
|                |                                                                          | 1554948_at       | 2.254284086 | 0.000925 |
|                | CDNA FLJ41369 fis, clone BRCAN2006117                                    | 242691_at        | 2.278201966 | 0.00366  |
| UGCGL1         | UDP-glucose ceramide glucosyltransferase-like 1                          | 222568_at        | 2.28546268  | 0.00062  |
| TOMM22         | translocase of outer mitochondrial membrane 22 homolog (yeast)           | 217960_s_at      | 2.324919287 | 0.00916  |
| FUS            | fusion (involved in t(12;16) in malignant liposarcoma)                   | 1565717_s_at     | 2.326397778 | 0.00096  |
| 15E1.2         | hypothetical protein LOC283459                                           | 214711_at        | 2.356731619 | 0.00023  |
| DDX17          | DEAD (Asp-Glu-Ala-Asp) box polypeptide 17                                | 230180_at        | 2.398399298 | 0.00297  |
| U2AF2          | U2 (RNU2) small nuclear RNA auxiliary factor 2                           | 218382_s_at      | 2.4219434   | 0.000404 |
| DNCH1          | dynein, cytoplasmic, heavy polypeptide 1                                 | 229115_at        | 2.429919229 | 0.0133   |
| ARHGDI1A       | Rho GDP dissociation inhibitor (GDI) alpha                               | 213606_s_at      | 2.505106949 | 0.0028   |
| ARHGDI1B       | Rho GDP dissociation inhibitor (GDI) alpha                               | 201167_x_at      | 2.538267802 | 0.00218  |
| GNL3L          | guanine nucleotide binding protein-like 3 (nucleolar)-like               | 205010_at        | 2.549904163 | 0.00062  |
|                |                                                                          | 228919_at        | 2.551476882 | 0.0156   |
| NUTF2          | nuclear transport factor 2                                               | 202397_at        | 2.564248854 | 0.000281 |
| RBBP5          | retinoblastoma binding protein 5                                         | 205169_at        | 2.567612463 | 9.46E-05 |
| HNRPL          | heterogeneous nuclear ribonucleoprotein L                                | 202072_at        | 2.580962638 | 0.00908  |
| TAOK1          | TAO kinase 1                                                             | 227454_at        | 2.60221469  | 0.000304 |
| C13orf3        | chromosome 13 open reading frame 3                                       | 227165_at        | 2.605341733 | 0.00159  |
|                |                                                                          | AFFX-HUMRGE/M100 | 2.731322615 | 0.00234  |
| SLD5           | SLD5 homolog ; SLD5 homolog                                              | 211767_at        | 2.766710461 | 0.00162  |
| EP400          | E1A binding protein p400                                                 | 230629_s_at      | 2.869850874 | 0.00162  |
| HNRPH1         | heterogeneous nuclear ribonucleoprotein H1 (H)                           | 213470_s_at      | 2.881569473 | 0.00782  |
| SET ; LOC38916 | SET translocation (myeloid leukemia-associated) ; similar to SET protei  | 215780_s_at      | 3.000097122 | 0.00082  |
| NARG1          | NMDA receptor regulated 1                                                | 222837_s_at      | 3.072662616 | 9.46E-05 |
| C1orf33        | Chromosome 1 open reading frame 33                                       | 235783_at        | 3.137221897 | 0.00203  |
| C14orf111      | chromosome 14 open reading frame 111                                     | 219927_at        | 3.170476231 | 0.00304  |
| THOC4          | THO complex 4                                                            | 226319_s_at      | 3.726514709 | 0.000258 |
| THOC4          | THO complex 4                                                            | 226320_at        | 3.868636423 | 0.000312 |
| SRP68          | signal recognition particle 68kDa                                        | AFFX-HUMRGE/M100 | 4.01986808  | 0.0183   |



Supplemental Table 2: Gene Ontology categories for 228 transcripts significantly differentially expressed (p<0.05, ANOVA) between lung cancer cell lines grown on tissue culture plastic (2D) and in 3D iRECM (

| Category                                                                               | Genes in Category | % of Genes in Category | Genes in List in Category | % of Genes in List in Category | p-Value  |
|----------------------------------------------------------------------------------------|-------------------|------------------------|---------------------------|--------------------------------|----------|
| GO:6259: DNA metabolism                                                                | 1551              | 5.209                  | 29                        | 20.71                          | 1.49E-10 |
| GO:7049: cell cycle                                                                    | 1966              | 6.603                  | 31                        | 22.14                          | 1.98E-09 |
| GO:43283: biopolymer metabolism                                                        | 7387              | 24.81                  | 67                        | 47.86                          | 2.90E-09 |
| GO:279: M phase                                                                        | 506               | 1.699                  | 14                        | 10                             | 1.29E-07 |
| GO:6139: nucleobase, nucleoside, nucleotide and nucleic acid metabolism                | 8303              | 27.89                  | 66                        | 47.14                          | 9.37E-07 |
| GO:51327: M phase of meiotic cell cycle                                                | 126               | 0.423                  | 7                         | 5                              | 2.31E-06 |
| GO:7126: meiosis                                                                       | 126               | 0.423                  | 7                         | 5                              | 2.31E-06 |
| GO:51321: meiotic cell cycle                                                           | 126               | 0.423                  | 7                         | 5                              | 2.31E-06 |
| GO:6974: response to DNA damage stimulus                                               | 649               | 2.18                   | 14                        | 10                             | 2.48E-06 |
| GO:6281: DNA repair                                                                    | 567               | 1.904                  | 13                        | 9.286                          | 2.99E-06 |
| GO:9719: response to endogenous stimulus                                               | 681               | 2.287                  | 14                        | 10                             | 4.32E-06 |
| GO:76: DNA replication checkpoint                                                      | 8                 | 0.0269                 | 3                         | 2.143                          | 5.60E-06 |
| GO:31570: DNA integrity checkpoint                                                     | 59                | 0.198                  | 5                         | 3.571                          | 8.73E-06 |
| GO:51084: posttranslational protein folding                                            | 28                | 0.094                  | 4                         | 2.857                          | 8.78E-06 |
| GO:278: mitotic cell cycle                                                             | 545               | 1.83                   | 12                        | 8.571                          | 1.09E-05 |
| GO:51168: nuclear export                                                               | 160               | 0.537                  | 7                         | 5                              | 1.12E-05 |
| GO:74: regulation of progression through cell cycle                                    | 1321              | 4.437                  | 19                        | 13.57                          | 1.44E-05 |
| GO:7052: mitotic spindle organization and biogenesis                                   | 34                | 0.114                  | 4                         | 2.857                          | 1.95E-05 |
| GO:16071: mRNA metabolism                                                              | 680               | 2.284                  | 13                        | 9.286                          | 2.07E-05 |
| GO:6188: IMP biosynthesis                                                              | 12                | 0.0403                 | 3                         | 2.143                          | 2.17E-05 |
| GO:6189: 'de novo' IMP biosynthesis                                                    | 12                | 0.0403                 | 3                         | 2.143                          | 2.17E-05 |
| GO:46040: IMP metabolism                                                               | 12                | 0.0403                 | 3                         | 2.143                          | 2.17E-05 |
| GO:43170: macromolecule metabolism                                                     | 10889             | 36.57                  | 75                        | 53.57                          | 2.94E-05 |
| GO:6260: DNA replication                                                               | 417               | 1.401                  | 10                        | 7.143                          | 2.97E-05 |
| GO:6310: DNA recombination                                                             | 196               | 0.658                  | 7                         | 5                              | 4.13E-05 |
| GO:7051: spindle organization and biogenesis                                           | 43                | 0.144                  | 4                         | 2.857                          | 5.01E-05 |
| GO:9113: purine base biosynthesis                                                      | 16                | 0.0537                 | 3                         | 2.143                          | 5.45E-05 |
| GO:45739: positive regulation of DNA repair                                            | 3                 | 0.0101                 | 2                         | 1.429                          | 6.56E-05 |
| GO:46605: regulation of centrosome cycle                                               | 3                 | 0.0101                 | 2                         | 1.429                          | 6.56E-05 |
| GO:46599: regulation of centriole replication                                          | 3                 | 0.0101                 | 2                         | 1.429                          | 6.56E-05 |
| GO:46600: negative regulation of centriole replication                                 | 3                 | 0.0101                 | 2                         | 1.429                          | 6.56E-05 |
| GO:46606: negative regulation of centrosome cycle                                      | 3                 | 0.0101                 | 2                         | 1.429                          | 6.56E-05 |
| GO:7099: centriole replication                                                         | 3                 | 0.0101                 | 2                         | 1.429                          | 6.56E-05 |
| GO:6978: DNA damage response, signal transduction by p53 class mediator resulting in   | 3                 | 0.0101                 | 2                         | 1.429                          | 6.56E-05 |
| GO:42772: DNA damage response, signal transduction resulting in transcription          | 3                 | 0.0101                 | 2                         | 1.429                          | 6.56E-05 |
| GO:6144: purine base metabolism                                                        | 18                | 0.0605                 | 3                         | 2.143                          | 7.88E-05 |
| GO:30330: DNA damage response, signal transduction by p53 class mediator               | 18                | 0.0605                 | 3                         | 2.143                          | 7.88E-05 |
| GO:51052: regulation of DNA metabolism                                                 | 95                | 0.319                  | 5                         | 3.571                          | 8.82E-05 |
| GO:16070: RNA metabolism                                                               | 1258              | 4.225                  | 17                        | 12.14                          | 9.06E-05 |
| GO:7067: mitosis                                                                       | 388               | 1.303                  | 9                         | 6.429                          | 9.65E-05 |
| GO:79: regulation of cyclin dependent protein kinase activity                          | 97                | 0.326                  | 5                         | 3.571                          | 9.74E-05 |
| GO:16043: cell organization and biogenesis                                             | 4222              | 14.18                  | 37                        | 26.43                          | 9.95E-05 |
| GO:6913: nucleocytoplasmic transport                                                   | 395               | 1.327                  | 9                         | 6.429                          | 0.00011  |
| GO:87: M phase of mitotic cell cycle                                                   | 395               | 1.327                  | 9                         | 6.429                          | 0.00011  |
| GO:9292: genetic transfer                                                              | 4                 | 0.0134                 | 2                         | 1.429                          | 0.000131 |
| GO:9294: DNA mediated transformation                                                   | 4                 | 0.0134                 | 2                         | 1.429                          | 0.000131 |
| GO:51298: centrosome duplication                                                       | 4                 | 0.0134                 | 2                         | 1.429                          | 0.000131 |
| GO:6397: mRNA processing                                                               | 605               | 2.032                  | 11                        | 7.857                          | 0.000142 |
| GO:6333: chromatin assembly or disassembly                                             | 346               | 1.162                  | 8                         | 5.714                          | 0.000242 |
| GO:6261: DNA-dependent DNA replication                                                 | 185               | 0.621                  | 6                         | 4.286                          | 0.00025  |
| GO:75: cell cycle checkpoint                                                           | 120               | 0.403                  | 5                         | 3.571                          | 0.000264 |
| GO:46907: intracellular transport                                                      | 1785              | 5.995                  | 20                        | 14.29                          | 0.000286 |
| GO:51649: establishment of cellular localization                                       | 1800              | 6.045                  | 20                        | 14.29                          | 0.000296 |
| GO:6611: protein export from nucleus                                                   | 28                | 0.094                  | 3                         | 2.143                          | 0.000306 |
| GO:51169: nuclear transport                                                            | 359               | 1.206                  | 8                         | 5.714                          | 0.00031  |
| GO:9127: purine nucleoside monophosphate biosynthesis                                  | 29                | 0.0974                 | 3                         | 2.143                          | 0.00034  |
| GO:9168: purine ribonucleoside monophosphate biosynthesis                              | 29                | 0.0974                 | 3                         | 2.143                          | 0.00034  |
| GO:9126: purine nucleoside monophosphate metabolism                                    | 29                | 0.0974                 | 3                         | 2.143                          | 0.00034  |
| GO:9167: purine ribonucleoside monophosphate metabolism                                | 29                | 0.0974                 | 3                         | 2.143                          | 0.00034  |
| GO:51641: cellular localization                                                        | 1821              | 6.116                  | 20                        | 14.29                          | 0.000344 |
| GO:46112: nucleobase biosynthesis                                                      | 31                | 0.104                  | 3                         | 2.143                          | 0.000415 |
| GO:51276: chromosome organization and biogenesis                                       | 807               | 2.71                   | 12                        | 8.571                          | 0.000446 |
| GO:8380: RNA splicing                                                                  | 478               | 1.605                  | 9                         | 6.429                          | 0.00045  |
| GO:46825: regulation of protein export from nucleus                                    | 7                 | 0.0235                 | 2                         | 1.429                          | 0.000454 |
| GO:42770: DNA damage response, signal transduction                                     | 79                | 0.265                  | 4                         | 2.857                          | 0.000535 |
| GO:9112: nucleobase metabolism                                                         | 35                | 0.118                  | 3                         | 2.143                          | 0.000596 |
| GO:51054: positive regulation of DNA metabolism                                        | 9                 | 0.0302                 | 2                         | 1.429                          | 0.000773 |
| GO:7001: chromosome organization and biogenesis (sensu Eukaryota)                      | 772               | 2.593                  | 11                        | 7.857                          | 0.00109  |
| GO:51329: interphase of mitotic cell cycle                                             | 165               | 0.554                  | 5                         | 3.571                          | 0.00112  |
| GO:51325: interphase                                                                   | 165               | 0.554                  | 5                         | 3.571                          | 0.00112  |
| GO:9156: ribonucleoside monophosphate biosynthesis                                     | 44                | 0.148                  | 3                         | 2.143                          | 0.00117  |
| GO:9161: ribonucleoside monophosphate metabolism                                       | 44                | 0.148                  | 3                         | 2.143                          | 0.00117  |
| GO:6396: RNA processing                                                                | 1039              | 3.49                   | 13                        | 9.286                          | 0.00127  |
| GO:6406: mRNA export from nucleus                                                      | 104               | 0.349                  | 4                         | 2.857                          | 0.0015   |
| GO:9124: nucleoside monophosphate biosynthesis                                         | 49                | 0.165                  | 3                         | 2.143                          | 0.0016   |
| GO:9123: nucleoside monophosphate metabolism                                           | 49                | 0.165                  | 3                         | 2.143                          | 0.0016   |
| GO:51028: mRNA transport                                                               | 109               | 0.366                  | 4                         | 2.857                          | 0.00178  |
| GO:51053: negative regulation of DNA metabolism                                        | 14                | 0.047                  | 2                         | 1.429                          | 0.00192  |
| GO:7062: sister chromatid cohesion                                                     | 14                | 0.047                  | 2                         | 1.429                          | 0.00192  |
| GO:398: nuclear mRNA splicing, via spliceosome                                         | 380               | 1.276                  | 7                         | 5                              | 0.0022   |
| GO:375: RNA splicing, via transesterification reactions                                | 380               | 1.276                  | 7                         | 5                              | 0.0022   |
| GO:377: RNA splicing, via transesterification reactions with bulged adenosine as nucle | 380               | 1.276                  | 7                         | 5                              | 0.0022   |
| GO:6359: regulation of transcription from RNA polymerase III promoter                  | 15                | 0.0504                 | 2                         | 1.429                          | 0.00221  |
| GO:6457: protein folding                                                               | 601               | 2.018                  | 9                         | 6.429                          | 0.00222  |
| GO:18105: peptidyl-serine phosphorylation                                              | 16                | 0.0537                 | 2                         | 1.429                          | 0.00252  |
| GO:18209: peptidyl-serine modification                                                 | 16                | 0.0537                 | 2                         | 1.429                          | 0.00252  |
| GO:46777: protein amino acid autophosphorylation                                       | 59                | 0.198                  | 3                         | 2.143                          | 0.00273  |
| GO:16540: protein autoprocessing                                                       | 60                | 0.202                  | 3                         | 2.143                          | 0.00286  |
| GO:8630: DNA damage response, signal transduction resulting in induction of apoptosis  | 18                | 0.0605                 | 2                         | 1.429                          | 0.0032   |
| GO:6325: establishment and/or maintenance of chromatin architecture                    | 643               | 2.16                   | 9                         | 6.429                          | 0.00346  |
| GO:7131: meiotic recombination                                                         | 65                | 0.218                  | 3                         | 2.143                          | 0.00359  |
| GO:6383: transcription from RNA polymerase III promoter                                | 66                | 0.222                  | 3                         | 2.143                          | 0.00375  |
| GO:6405: RNA export from nucleus                                                       | 134               | 0.45                   | 4                         | 2.857                          | 0.00375  |
| GO:6323: DNA packaging                                                                 | 661               | 2.22                   | 9                         | 6.429                          | 0.00415  |
| GO:226: microtubule cytoskeleton organization and biogenesis                           | 138               | 0.463                  | 4                         | 2.857                          | 0.00416  |

|                                                                                      |       |         |     |       |         |
|--------------------------------------------------------------------------------------|-------|---------|-----|-------|---------|
| GO:50657: nucleic acid transport                                                     | 139   | 0.467   | 4   | 2.857 | 0.00427 |
| GO:50658: RNA transport                                                              | 139   | 0.467   | 4   | 2.857 | 0.00427 |
| GO:51236: establishment of RNA localization                                          | 139   | 0.467   | 4   | 2.857 | 0.00427 |
| GO:6996: organelle organization and biogenesis                                       | 2248  | 7.55    | 20  | 14.29 | 0.00431 |
| GO:50875: cellular physiological process                                             | 24283 | 81.55   | 126 | 90    | 0.00434 |
| GO:45786: negative regulation of progression through cell cycle                      | 545   | 1.83    | 8   | 5.714 | 0.00435 |
| GO:6950: response to stress                                                          | 2411  | 8.097   | 21  | 15    | 0.00439 |
| GO:6450: regulation of translational fidelity                                        | 1     | 0.00336 | 1   | 0.714 | 0.0047  |
| GO:6605: protein targeting                                                           | 437   | 1.468   | 7   | 5     | 0.00473 |
| GO:6282: regulation of DNA repair                                                    | 22    | 0.0739  | 2   | 1.429 | 0.00477 |
| GO:7098: centrosome cycle                                                            | 22    | 0.0739  | 2   | 1.429 | 0.00477 |
| GO:31023: microtubule organizing center organization and biogenesis                  | 22    | 0.0739  | 2   | 1.429 | 0.00477 |
| GO:51297: centrosome organization and biogenesis                                     | 22    | 0.0739  | 2   | 1.429 | 0.00477 |
| GO:6403: RNA localization                                                            | 146   | 0.49    | 4   | 2.857 | 0.00508 |
| GO:7127: meiosis I                                                                   | 75    | 0.252   | 3   | 2.143 | 0.00537 |
| GO:46483: heterocycle metabolism                                                     | 155   | 0.521   | 4   | 2.857 | 0.00626 |
| GO:15931: nucleobase, nucleoside, nucleotide and nucleic acid transport              | 161   | 0.541   | 4   | 2.857 | 0.00715 |
| GO:7017: microtubule-based process                                                   | 366   | 1.229   | 6   | 4.286 | 0.00784 |
| GO:48523: negative regulation of cellular process                                    | 2058  | 6.912   | 18  | 12.86 | 0.008   |
| GO:6275: regulation of DNA replication                                               | 30    | 0.101   | 2   | 1.429 | 0.00876 |
| GO:44238: primary metabolism                                                         | 17197 | 57.76   | 95  | 67.86 | 0.00898 |
| GO:6164: purine nucleotide biosynthesis                                              | 174   | 0.584   | 4   | 2.857 | 0.00933 |
| GO:9076: histidine family amino acid biosynthesis                                    | 2     | 0.00672 | 1   | 0.714 | 0.00938 |
| GO:105: histidine biosynthesis                                                       | 2     | 0.00672 | 1   | 0.714 | 0.00938 |
| GO:6163: purine nucleotide metabolism                                                | 185   | 0.621   | 4   | 2.857 | 0.0115  |
| GO:51223: regulation of protein transport                                            | 36    | 0.121   | 2   | 1.429 | 0.0125  |
| GO:6334: nucleosome assembly                                                         | 195   | 0.655   | 4   | 2.857 | 0.0137  |
| GO:9165: nucleotide biosynthesis                                                     | 299   | 1.004   | 5   | 3.571 | 0.0137  |
| GO:48519: negative regulation of biological process                                  | 2181  | 7.325   | 18  | 12.86 | 0.014   |
| GO:51243: negative regulation of cellular physiological process                      | 1858  | 6.24    | 16  | 11.43 | 0.014   |
| GO:8054: cyclin catabolism                                                           | 3     | 0.0101  | 1   | 0.714 | 0.014   |
| GO:46834: lipid phosphorylation                                                      | 3     | 0.0101  | 1   | 0.714 | 0.014   |
| GO:46854: phosphoinositide phosphorylation                                           | 3     | 0.0101  | 1   | 0.714 | 0.014   |
| GO:48227: plasma membrane to endosome transport                                      | 3     | 0.0101  | 1   | 0.714 | 0.014   |
| GO:22: mitotic spindle elongation                                                    | 3     | 0.0101  | 1   | 0.714 | 0.014   |
| GO:51231: spindle elongation                                                         | 3     | 0.0101  | 1   | 0.714 | 0.014   |
| GO:7292: female gamete generation                                                    | 39    | 0.131   | 2   | 1.429 | 0.0145  |
| GO:7162: negative regulation of cell adhesion                                        | 40    | 0.134   | 2   | 1.429 | 0.0152  |
| GO:6473: protein amino acid acetylation                                              | 41    | 0.138   | 2   | 1.429 | 0.016   |
| GO:30521: androgen receptor signaling pathway                                        | 114   | 0.383   | 3   | 2.143 | 0.0167  |
| GO:43118: negative regulation of physiological process                               | 1898  | 6.374   | 16  | 11.43 | 0.0168  |
| GO:6270: DNA replication initiation                                                  | 43    | 0.144   | 2   | 1.429 | 0.0175  |
| GO:44237: cellular metabolism                                                        | 17754 | 59.63   | 96  | 68.57 | 0.0179  |
| GO:6433: prolyl-tRNA aminoacylation                                                  | 4     | 0.0134  | 1   | 0.714 | 0.0187  |
| GO:42026: protein refolding                                                          | 4     | 0.0134  | 1   | 0.714 | 0.0187  |
| GO:6369: transcription termination from RNA polymerase II promoter                   | 4     | 0.0134  | 1   | 0.714 | 0.0187  |
| GO:31497: chromatin assembly                                                         | 215   | 0.722   | 4   | 2.857 | 0.0189  |
| GO:6886: intracellular protein transport                                             | 1154  | 3.876   | 11  | 7.857 | 0.0206  |
| GO:16485: protein processing                                                         | 125   | 0.42    | 3   | 2.143 | 0.0213  |
| GO:18193: peptidyl-amino acid modification                                           | 125   | 0.42    | 3   | 2.143 | 0.0213  |
| GO:6626: protein targeting to mitochondrion                                          | 48    | 0.161   | 2   | 1.429 | 0.0215  |
| GO:45893: positive regulation of transcription, DNA-dependent                        | 337   | 1.132   | 5   | 3.571 | 0.0218  |
| GO:45859: regulation of protein kinase activity                                      | 338   | 1.135   | 5   | 3.571 | 0.022   |
| GO:51338: regulation of transferase activity                                         | 339   | 1.139   | 5   | 3.571 | 0.0223  |
| GO:80: G1 phase of mitotic cell cycle                                                | 52    | 0.175   | 2   | 1.429 | 0.025   |
| GO:51318: G1 phase                                                                   | 52    | 0.175   | 2   | 1.429 | 0.025   |
| GO:77: DNA damage checkpoint                                                         | 54    | 0.181   | 2   | 1.429 | 0.0268  |
| GO:9139: pyrimidine nucleoside diphosphate biosynthesis                              | 6     | 0.0202  | 1   | 0.714 | 0.0279  |
| GO:9197: pyrimidine deoxyribonucleoside diphosphate biosynthesis                     | 6     | 0.0202  | 1   | 0.714 | 0.0279  |
| GO:6233: dTDP biosynthesis                                                           | 6     | 0.0202  | 1   | 0.714 | 0.0279  |
| GO:9148: pyrimidine nucleoside triphosphate biosynthesis                             | 6     | 0.0202  | 1   | 0.714 | 0.0279  |
| GO:9212: pyrimidine deoxyribonucleoside triphosphate biosynthesis                    | 6     | 0.0202  | 1   | 0.714 | 0.0279  |
| GO:6235: dTTP biosynthesis                                                           | 6     | 0.0202  | 1   | 0.714 | 0.0279  |
| GO:9202: deoxyribonucleoside triphosphate biosynthesis                               | 6     | 0.0202  | 1   | 0.714 | 0.0279  |
| GO:30174: regulation of DNA replication initiation                                   | 6     | 0.0202  | 1   | 0.714 | 0.0279  |
| GO:46075: dTTP metabolism                                                            | 6     | 0.0202  | 1   | 0.714 | 0.0279  |
| GO:9196: pyrimidine deoxyribonucleoside diphosphate metabolism                       | 6     | 0.0202  | 1   | 0.714 | 0.0279  |
| GO:46072: dTDP metabolism                                                            | 6     | 0.0202  | 1   | 0.714 | 0.0279  |
| GO:46685: response to arsenic                                                        | 6     | 0.0202  | 1   | 0.714 | 0.0279  |
| GO:46822: regulation of nucleocytoplasmic transport                                  | 57    | 0.191   | 2   | 1.429 | 0.0296  |
| GO:8629: induction of apoptosis by intracellular signals                             | 59    | 0.198   | 2   | 1.429 | 0.0315  |
| GO:8156: negative regulation of DNA replication                                      | 7     | 0.0235  | 1   | 0.714 | 0.0325  |
| GO:35067: negative regulation of histone acetylation                                 | 7     | 0.0235  | 1   | 0.714 | 0.0325  |
| GO:31057: negative regulation of histone modification                                | 7     | 0.0235  | 1   | 0.714 | 0.0325  |
| GO:320: re-entry into mitotic cell cycle                                             | 7     | 0.0235  | 1   | 0.714 | 0.0325  |
| GO:45023: G0 to G1 transition                                                        | 7     | 0.0235  | 1   | 0.714 | 0.0325  |
| GO:6725: aromatic compound metabolism                                                | 260   | 0.873   | 4   | 2.857 | 0.0347  |
| GO:6424: glutamyl-tRNA aminoacylation                                                | 8     | 0.0269  | 1   | 0.714 | 0.037   |
| GO:9133: nucleoside diphosphate biosynthesis                                         | 8     | 0.0269  | 1   | 0.714 | 0.037   |
| GO:9189: deoxyribonucleoside diphosphate biosynthesis                                | 8     | 0.0269  | 1   | 0.714 | 0.037   |
| GO:31571: G1 DNA damage checkpoint                                                   | 8     | 0.0269  | 1   | 0.714 | 0.037   |
| GO:6977: DNA damage response, signal transduction by p53 class mediator resulting in | 8     | 0.0269  | 1   | 0.714 | 0.037   |
| GO:30518: steroid hormone receptor signaling pathway                                 | 156   | 0.524   | 3   | 2.143 | 0.0375  |
| GO:9893: positive regulation of metabolism                                           | 530   | 1.78    | 6   | 4.286 | 0.0396  |
| GO:30522: intracellular receptor-mediated signaling pathway                          | 161   | 0.541   | 3   | 2.143 | 0.0406  |
| GO:59: protein import into nucleus, docking                                          | 68    | 0.228   | 2   | 1.429 | 0.0409  |
| GO:42177: negative regulation of protein catabolism                                  | 9     | 0.0302  | 1   | 0.714 | 0.0415  |
| GO:31056: regulation of histone modification                                         | 9     | 0.0302  | 1   | 0.714 | 0.0415  |
| GO:35065: regulation of histone acetylation                                          | 9     | 0.0302  | 1   | 0.714 | 0.0415  |
| GO:6474: N-terminal protein amino acid acetylation                                   | 9     | 0.0302  | 1   | 0.714 | 0.0415  |
| GO:6273: lagging strand elongation                                                   | 9     | 0.0302  | 1   | 0.714 | 0.0415  |
| GO:6269: DNA replication, synthesis of RNA primer                                    | 9     | 0.0302  | 1   | 0.714 | 0.0415  |
| GO:9211: pyrimidine deoxyribonucleoside triphosphate metabolism                      | 9     | 0.0302  | 1   | 0.714 | 0.0415  |
| GO:9200: deoxyribonucleoside triphosphate metabolism                                 | 9     | 0.0302  | 1   | 0.714 | 0.0415  |
| GO:9152: purine ribonucleotide biosynthesis                                          | 166   | 0.558   | 3   | 2.143 | 0.0438  |
| GO:7266: Rho protein signal transduction                                             | 71    | 0.238   | 2   | 1.429 | 0.0442  |
| GO:7386: compartment specification                                                   | 10    | 0.0336  | 1   | 0.714 | 0.046   |
| GO:6353: transcription termination                                                   | 10    | 0.0336  | 1   | 0.714 | 0.046   |

GO:45941: positive regulation of transcription

419

1.407

5

3.571 0.0483

(3D) for which p-value of association is less than 0.5

Supplemental Table 3: 200 transcripts significantly differentially expressed ( $p < 1e-5$ ) between lung cancer cell lines showing smooth morphology vs branching morphology wher

| Gene Symbol    | Description                                                     | Affymetrix probe ID | average expression smooth/average expression branching | p-value  |
|----------------|-----------------------------------------------------------------|---------------------|--------------------------------------------------------|----------|
| FLJ10781       | hypothetical protein FLJ10781                                   | 218824_at           | 0.026522763                                            | 9.70E-08 |
| WT1            | Wilms tumor 1                                                   | 206067_s_at         | 0.027970246                                            | 1.14E-06 |
| TCF7L1         | transcription factor 7-like 1 (T-cell specific, HMG-box) ; tran | 221016_s_at         | 0.035459787                                            | 9.24E-07 |
| KIF1A          | kinesin family member 1A                                        | 225482_at           | 0.036202831                                            | 9.04E-06 |
| TTMB           | cDNA DKFZp434C184 gene                                          | 227386_s_at         | 0.045406296                                            | 2.14E-10 |
| LHX2           | LIM homeobox 2                                                  | 211219_s_at         | 0.064920075                                            | 6.14E-07 |
| NPTX2          | neuronal pentraxin II                                           | 213479_at           | 0.076148159                                            | 1.26E-06 |
| FBXO27         | F-box protein 27                                                | 235169_at           | 0.086044946                                            | 1.10E-06 |
| LOC90557 ; DKF | hypothetical protein BC016861 ; hypothetical protein DKFZ       | 227966_s_at         | 0.091358528                                            | 2.01E-07 |
|                | CDNA clone IMAGE:5300488                                        | 228422_at           | 0.093227684                                            | 4.36E-09 |
| BMP7           | bone morphogenetic protein 7 (osteogenic protein 1)             | 209591_s_at         | 0.096329407                                            | 3.39E-06 |
| BTG3           | BTG family, member 3                                            | 215425_at           | 0.102131223                                            | 6.14E-07 |
| TLE2           | transducin-like enhancer of split 2 (E(sp1) homolog, Drosop     | 40837_at            | 0.105190168                                            | 5.38E-06 |
| TLE2           | transducin-like enhancer of split 2 (E(sp1) homolog, Drosop     | 204431_at           | 0.111191948                                            | 3.74E-06 |
| FBXO2          | F-box protein 2                                                 | 219305_x_at         | 0.11138998                                             | 5.73E-06 |
|                | LOC440476                                                       | 1555976_s_at        | 0.114294077                                            | 8.76E-06 |
| MICB           | MHC class I polypeptide-related sequence B                      | 206247_at           | 0.119330158                                            | 1.95E-06 |
| CRMP1          | collapsin response mediator protein 1                           | 202517_at           | 0.121865367                                            | 4.02E-06 |
| RAB6B          | RAB6B, member RAS oncogene family                               | 225259_at           | 0.130417863                                            | 5.13E-09 |
| PLCXD1         | phosphatidylinositol-specific phospholipase C, X domain co      | 218951_s_at         | 0.132606522                                            | 5.73E-06 |
| MGC11082       | Hypothetical protein MGC11082                                   | 1560019_at          | 0.137276259                                            | 1.50E-06 |
| PHC1           | polyhomeotic-like 1 (Drosophila)                                | 218338_at           | 0.140347167                                            | 5.56E-06 |
| MRPS30         | mitochondrial ribosomal protein S30                             | 218398_at           | 0.144295795                                            | 3.12E-07 |
| CXADR          | coxsackie virus and adenovirus receptor                         | 1555716_a_at        | 0.150127637                                            | 6.65E-07 |
| GOLGA8A        | golgi autoantigen, golgin subfamily a, 8A                       | 208798_x_at         | 0.154733571                                            | 4.93E-06 |
| CD40           | CD40 antigen (TNF receptor superfamily member 5)                | 215346_at           | 0.160868314                                            | 8.04E-06 |
| PRRX2          | paired related homeobox 2                                       | 219729_at           | 0.172400255                                            | 2.14E-10 |
| AOF1           | amine oxidase (flavin containing) domain 1                      | 1553150_at          | 0.173976928                                            | 1.86E-06 |
| CTSL2          | cathepsin L2                                                    | 210074_at           | 0.191967293                                            | 2.02E-06 |
| DCUN1D4        | DCN1, defective in cullin neddylation 1, domain containing      | 212855_at           | 0.206726968                                            | 1.20E-08 |
| CXADR          | coxsackie virus and adenovirus receptor                         | 203917_at           | 0.218793286                                            | 1.63E-08 |
| CSPG5          | chondroitin sulfate proteoglycan 5 (neuroglycan C)              | 39966_at            | 0.225707946                                            | 6.03E-06 |
| LATS2          | LATS, large tumor suppressor, homolog 2 (Drosophila)            | 227013_at           | 0.226314921                                            | 3.48E-06 |
|                | Full-length cDNA clone CS0DF012YG01 of Fetal brain of H         | 226374_at           | 0.234492395                                            | 1.20E-08 |
| USP46          | ubiquitin specific peptidase 46                                 | 203869_at           | 0.236243962                                            | 3.58E-11 |
| MTMR12         | myotubularin related protein 12                                 | 225232_at           | 0.262227867                                            | 7.25E-06 |
| FGFR1OP2       | FGFR1 oncogene partner 2                                        | 233898_s_at         | 0.26317747                                             | 1.24E-06 |
| LPHN1          | latrophilin 1                                                   | 203488_at           | 0.265328673                                            | 3.62E-06 |
| ARID3A         | AT rich interactive domain 3A (BRIGHT- like)                    | 205865_at           | 0.265996333                                            | 3.69E-06 |
| DZIP3          | zinc finger DAZ interacting protein 3                           | 207231_at           | 0.26830175                                             | 1.77E-06 |
| HDAC5          | histone deacetylase 5                                           | 202455_at           | 0.269512982                                            | 5.05E-06 |
| STAT3          | signal transducer and activator of transcription 3 (acute-ph    | 208991_at           | 0.272629212                                            | 3.20E-08 |
| C12orf11       | chromosome 12 open reading frame 11                             | 221652_s_at         | 0.275087269                                            | 6.65E-06 |
| DZIP3          | zinc finger DAZ interacting protein 3                           | 207232_s_at         | 0.275847649                                            | 8.28E-06 |
| STAT3          | signal transducer and activator of transcription 3 (acute-ph    | 208992_s_at         | 0.282720127                                            | 3.03E-08 |
| RAB23          | RAB23, member RAS oncogene family                               | 229504_at           | 0.283935678                                            | 1.93E-06 |
| FLJ32363       | FLJ32363 protein                                                | 229886_at           | 0.28770019                                             | 9.06E-06 |
| LOC255783      | hypothetical protein LOC255783                                  | 227325_at           | 0.29425867                                             | 5.38E-06 |
| PCBP4          | poly(rC) binding protein 4                                      | 209361_s_at         | 0.30365814                                             | 5.83E-06 |
| C1orf108       | chromosome 1 open reading frame 108                             | 222459_at           | 0.311138055                                            | 3.38E-06 |
|                | PREDICTED: Homo sapiens olfactory receptor, family 7, su        | 217499_x_at         | 0.324882561                                            | 3.96E-06 |
| FLJ30596       | hypothetical protein FLJ30596                                   | 228594_at           | 0.329882488                                            | 8.28E-06 |
| FLJ38984       | hypothetical protein FLJ38984                                   | 212791_at           | 0.345549778                                            | 5.79E-06 |
| MGC33584       | hypothetical protein MGC33584                                   | 228226_s_at         | 0.348472219                                            | 4.88E-06 |
| PPT2 ; EGFL8   | palmitoyl-protein thioesterase 2 ; EGF-like-domain, multiple    | 209826_at           | 0.354236356                                            | 4.88E-06 |
| CD83           | CD83 antigen (activated B lymphocytes, immunoglobulin su        | 204440_at           | 0.36212833                                             | 1.29E-06 |
|                | CDNA clone IMAGE:6615994                                        | 228389_at           | 0.367848154                                            | 8.36E-06 |
|                | Transcribed locus, weakly similar to XP_496299.1 PREDIC         | 227547_at           | 0.370268713                                            | 5.47E-06 |
| TEX27          | testis expressed sequence 27                                    | 222493_s_at         | 0.378664323                                            | 3.62E-06 |
| LOC285636      | hypothetical protein LOC285636                                  | 226159_at           | 0.437053481                                            | 1.50E-06 |
|                | Transcribed locus                                               | 240170_at           | 0.448017997                                            | 6.65E-06 |
| CCHCR1         | coiled-coil alpha-helical rod protein 1                         | 209698_at           | 0.480069913                                            | 4.37E-06 |
| CCHCR1         | coiled-coil alpha-helical rod protein 1                         | 37425_g_at          | 0.520910728                                            | 6.65E-06 |
| LOC51234       | hypothetical protein LOC51234                                   | 223857_x_at         | 1.572233676                                            | 5.60E-06 |
| FLJ10803       | hypothetical protein FLJ10803                                   | 209445_x_at         | 1.622308994                                            | 4.99E-07 |
| SFRS9          | Splicing factor, arginine/serine-rich 9                         | 225430_at           | 1.730202538                                            | 8.30E-06 |
| FAM96A         | family with sequence similarity 96, member A                    | 224779_s_at         | 1.815121405                                            | 4.02E-06 |
| NUDT9          | nudix (nucleoside diphosphate linked moiety X)-type motif       | 218375_at           | 1.820523692                                            | 2.90E-06 |
| NAT5           | N-acetyltransferase 5 (ARD1 homolog, S. cerevisiae)             | 223040_at           | 2.111132201                                            | 1.50E-06 |
| C20orf18       | chromosome 20 open reading frame 18                             | 207713_s_at         | 2.146510999                                            | 1.66E-06 |
| GSPT1          | G1 to S phase transition 1                                      | 240452_at           | 2.248460758                                            | 7.57E-07 |
| PPP2R5C        | protein phosphatase 2, regulatory subunit B (B56), gamma        | 213305_s_at         | 2.342143                                               | 3.49E-06 |
| PPP2R5C        | protein phosphatase 2, regulatory subunit B (B56), gamma        | 1554365_a_at        | 2.383422255                                            | 2.78E-06 |
| CASK           | calcium/calmodulin-dependent serine protein kinase (MAGI        | 211208_s_at         | 2.383746451                                            | 5.27E-06 |
| ATBF1          | AT-binding transcription factor 1                               | 242738_s_at         | 2.42039374                                             | 1.96E-07 |
| UQCRCB         | ubiquinol-cytochrome c reductase binding protein                | 209065_at           | 2.474904852                                            | 5.27E-06 |

|                |                                                              |              |             |          |
|----------------|--------------------------------------------------------------|--------------|-------------|----------|
| FTSJ1          | FtsJ homolog 1 (E. coli)                                     | 205324_s_at  | 2.528614964 | 8.30E-06 |
| B4GALT1        | UDP-Gal:betaGlcNAc beta 1,4- galactosyltransferase, poly     | 201883_s_at  | 2.598716443 | 8.52E-06 |
| AP3S2          | adaptor-related protein complex 3, sigma 2 subunit           | 202399_s_at  | 2.63225635  | 1.42E-06 |
| EBP            | emopamil binding protein (sterol isomerase)                  | 202735_at    | 2.699804141 | 1.20E-07 |
| EBP            | emopamil binding protein (sterol isomerase)                  | 213787_s_at  | 2.769268309 | 1.29E-06 |
| TES            | testis derived transcript (3 LIM domains)                    | 202720_at    | 2.791997723 | 5.90E-06 |
| CUTL1          | cut-like 1, CCAAT displacement protein (Drosophila)          | 202367_at    | 2.82453316  | 1.95E-06 |
| TCTE1L         | t-complex-associated-testis-expressed 1-like                 | 203303_at    | 2.830855748 | 4.15E-07 |
| FLJ90013       | hypothetical protein FLJ90013                                | 227407_at    | 2.928864174 | 9.40E-06 |
| PTPRU          | protein tyrosine phosphatase, receptor type, U               | 211320_s_at  | 2.968832142 | 8.97E-06 |
| IMPA2          | inositol(myo)-1(or 4)-monophosphatase 2                      | 203126_at    | 3.049890533 | 8.33E-07 |
| B4GALT1        | UDP-Gal:betaGlcNAc beta 1,4- galactosyltransferase, poly     | 228498_at    | 3.276874057 | 5.87E-06 |
| TSPAN3         | tetraspanin 3                                                | 200972_at    | 3.277571063 | 2.65E-07 |
| KIAA1815       | KIAA1815                                                     | 218342_s_at  | 3.311686426 | 4.02E-06 |
| TBC1D2         | TBC1 domain family, member 2                                 | 222173_s_at  | 3.424179873 | 1.29E-06 |
| CST3           | cystatin C (amyloid angiopathy and cerebral hemorrhage)      | 201360_at    | 3.43755114  | 2.54E-06 |
|                | Full length insert cDNA YH77E09                              | 213750_at    | 3.531593757 | 4.46E-07 |
| PDXK           | pyridoxal (pyridoxine, vitamin B6) kinase                    | 218019_s_at  | 3.557504217 | 7.63E-06 |
| TSPAN3         | tetraspanin 3                                                | 200973_s_at  | 3.775396944 | 2.08E-07 |
| ABCC3          | ATP-binding cassette, sub-family C (CFTR/MRP), member        | 239217_x_at  | 3.977203866 | 8.88E-09 |
| FLJ31842       | Transmembrane protein 56                                     | 237515_at    | 4.096655367 | 6.65E-06 |
| RPL13          | Ribosomal protein L13                                        | 229590_at    | 4.469971976 | 5.27E-06 |
| MFSD3          | major facilitator superfamily domain containing 3            | 227296_at    | 4.48378551  | 2.90E-06 |
| ASAH1          | N-acylsphingosine amidohydrolase (acid ceramidase) 1         | 1555419_a_at | 4.547002556 | 8.30E-06 |
| DSG2           | desmoglein 2                                                 | 1553105_s_at | 4.667432604 | 8.93E-06 |
| TREX1          | three prime repair exonuclease 1                             | 34689_at     | 4.95109193  | 1.23E-08 |
| NFKBIZ         | nuclear factor of kappa light polypeptide gene enhancer in f | 223217_s_at  | 5.30407433  | 5.36E-07 |
| KIAA0992       | palladin                                                     | 200906_s_at  | 5.78765253  | 6.49E-06 |
| ARSD           | arylsulfatase D                                              | 232423_at    | 5.806278059 | 4.02E-06 |
| LRRC54         | leucine rich repeat containing 54                            | 218245_at    | 6.074117685 | 6.69E-06 |
| NFKBIZ         | nuclear factor of kappa light polypeptide gene enhancer in f | 223218_s_at  | 6.443526521 | 6.65E-07 |
| CREG1          | cellular repressor of E1A-stimulated genes 1                 | 201200_at    | 6.512848657 | 4.02E-06 |
| KIAA0992       | palladin                                                     | 200897_s_at  | 6.564571491 | 1.72E-07 |
| RPH3AL         | rabphilin 3A-like (without C2 domains)                       | 221614_s_at  | 6.71948824  | 6.50E-07 |
| RAI17          | retinoic acid induced 17                                     | 212124_at    | 6.737375502 | 2.11E-06 |
| KIAA0992       | palladin                                                     | 200907_s_at  | 6.771293213 | 1.17E-07 |
| HIPK2          | homeodomain interacting protein kinase 2                     | 219028_at    | 6.820318953 | 6.96E-09 |
| HIPK2          | Homeodomain interacting protein kinase 2                     | 225115_at    | 7.097917973 | 1.84E-09 |
| TREX1          | three prime repair exonuclease 1                             | 205875_s_at  | 7.104319452 | 2.80E-06 |
| FLJ20245       | hypothetical protein FLJ20245                                | 219620_x_at  | 7.90901697  | 1.06E-07 |
| TRIM38         | tripartite motif-containing 38                               | 203568_s_at  | 8.265726258 | 5.83E-06 |
| GOLPH2         | golgi phosphoprotein 2                                       | 217771_at    | 10.6698893  | 6.54E-12 |
| UGDH           | UDP-glucose dehydrogenase                                    | 203343_at    | 10.71894866 | 1.98E-07 |
| CTSC           | cathepsin C                                                  | 231234_at    | 10.7699814  | 6.86E-06 |
| HIPK2          | Homeodomain interacting protein kinase 2                     | 225097_at    | 11.09353557 | 9.07E-08 |
| NEDD9          | neural precursor cell expressed, developmentally down-reg    | 202150_s_at  | 12.2867792  | 5.13E-09 |
| VEGFC          | vascular endothelial growth factor C                         | 209946_at    | 12.4054093  | 3.52E-06 |
| C9orf3         | chromosome 9 open reading frame 3                            | 212848_s_at  | 14.17804523 | 2.20E-10 |
| HIPK2          | Homeodomain interacting protein kinase 2                     | 225116_at    | 15.32774269 | 7.84E-09 |
| TUBA1          | tubulin, alpha 1 (testis specific)                           | 212242_at    | 15.55305203 | 8.28E-09 |
| HIPK2          | Homeodomain interacting protein kinase 2                     | 225368_at    | 15.66112711 | 4.36E-09 |
| KITLG          | KIT ligand                                                   | 226534_at    | 15.73313065 | 3.00E-06 |
| VLDLR          | very low density lipoprotein receptor                        | 209822_s_at  | 16.11466049 | 7.63E-06 |
| EDN1           | endothelin 1                                                 | 222802_at    | 17.22332376 | 6.38E-06 |
| SMARCA2        | SWI/SNF related, matrix associated, actin dependent regul    | 206542_s_at  | 17.44627514 | 8.55E-08 |
| ALDH3B1        | aldehyde dehydrogenase 3 family, member B1                   | 205640_at    | 18.61394235 | 2.59E-06 |
| MAML3          | mastermind-like 3 (Drosophila)                               | 242794_at    | 19.40889968 | 8.30E-06 |
| SMARCA2        | SWI/SNF related, matrix associated, actin dependent regul    | 206544_x_at  | 19.46402383 | 3.71E-10 |
| CTSC           | cathepsin C                                                  | 225647_s_at  | 19.48223399 | 6.69E-06 |
| TPD52L1        | tumor protein D52-like 1                                     | 203786_s_at  | 20.711499   | 1.66E-06 |
| CPEB2          | cytoplasmic polyadenylation element binding protein 2        | 226939_at    | 21.12773417 | 6.96E-06 |
| SMARCA2        | SWI/SNF related, matrix associated, actin dependent regul    | 217707_x_at  | 21.24528863 | 2.75E-08 |
| RBPM5          | RNA binding protein with multiple splicing                   | 209488_s_at  | 21.32693626 | 6.49E-06 |
| CTSC           | cathepsin C                                                  | 201487_at    | 21.91940186 | 8.83E-07 |
| KRT8           | Keratin 8                                                    | 229879_at    | 22.23350294 | 6.43E-08 |
| FLJ14054       | hypothetical protein FLJ14054                                | 219054_at    | 24.42077345 | 3.35E-08 |
| TRIM16 ; LOC14 | tripartite motif-containing 16 ; similar to tripartite moti  | 204341_at    | 24.71430968 | 2.04E-06 |
| CARD6          | caspase recruitment domain family, member 6 ; caspase re     | 224414_s_at  | 26.3276415  | 3.84E-08 |
| SERPINB1       | Serpin peptidase inhibitor, clade B (ovalbumin), member 1    | 228726_at    | 27.51500265 | 1.56E-08 |
| GLIS3          | GLIS family zinc finger 3                                    | 229435_at    | 28.69269938 | 1.45E-07 |
| MGST2          | microsomal glutathione S-transferase 2                       | 204168_at    | 29.58147572 | 1.84E-09 |
| MLPH           | Melanophilin                                                 | 229150_at    | 30.17823672 | 1.17E-11 |
| TRIP6          | thyroid hormone receptor interactor 6                        | 209129_at    | 30.68028503 | 7.63E-06 |
| DHRS3          | dehydrogenase/reductase (SDR family) member 3                | 202481_at    | 31.67322322 | 1.45E-06 |
| TRIM38         | tripartite motif-containing 38                               | 203567_s_at  | 34.00765267 | 3.17E-08 |
| CD24           | CD24 antigen (small cell lung carcinoma cluster 4 antigen)   | 209772_s_at  | 38.07335939 | 1.18E-09 |
| NTN4           | netrin 4                                                     | 223315_at    | 38.29795836 | 5.83E-06 |
| S100A13        | S100 calcium binding protein A13                             | 202598_at    | 41.09486998 | 9.50E-08 |
| SERPINB1       | serpin peptidase inhibitor, clade B (ovalbumin), member 1    | 213572_s_at  | 41.14050738 | 1.00E-06 |

|          |                                                             |              |             |          |
|----------|-------------------------------------------------------------|--------------|-------------|----------|
| SLC27A2  | solute carrier family 27 (fatty acid transporter), member 2 | 205768_s_at  | 43.3017856  | 4.36E-09 |
| PTGS2    | prostaglandin-endoperoxide synthase 2 (prostaglandin G/H    | 204748_at    | 44.83580873 | 5.31E-06 |
| CD24     | CD24 antigen (small cell lung carcinoma cluster 4 antigen)  | 208650_s_at  | 46.83420411 | 1.79E-06 |
| RIN2     | Ras and Rab interactor 2                                    | 209684_at    | 48.07121424 | 5.74E-10 |
| GLRX     | glutaredoxin (thioltransferase)                             | 209276_s_at  | 48.87772539 | 5.51E-06 |
| SERPINB1 | serpin peptidase inhibitor, clade B (ovalbumin), member 1   | 212268_at    | 51.28625449 | 7.12E-07 |
| DNAJC12  | DnaJ (Hsp40) homolog, subfamily C, member 12                | 223721_s_at  | 51.84365115 | 1.99E-08 |
| CD24     | CD24 antigen (small cell lung carcinoma cluster 4 antigen)  | 208651_x_at  | 52.91719504 | 3.35E-08 |
| OAS1     | 2',5'-oligoadenylate synthetase 1, 40/46kDa                 | 202869_at    | 57.68830975 | 3.93E-07 |
| S100A4   | S100 calcium binding protein A4 (calcium protein, calvascu  | 203186_s_at  | 58.67246312 | 1.88E-06 |
| SLC27A2  | solute carrier family 27 (fatty acid transporter), member 2 | 205769_at    | 58.80188792 | 9.66E-10 |
| MYO5B    | myosin VB                                                   | 225301_s_at  | 59.3791451  | 2.49E-08 |
| TNFAIP2  | tumor necrosis factor, alpha-induced protein 2              | 202510_s_at  | 61.2726663  | 4.51E-09 |
| CD24     | CD24 antigen (small cell lung carcinoma cluster 4 antigen)  | 209771_x_at  | 70.66946762 | 1.38E-07 |
| LXN      | latexin                                                     | 218729_at    | 72.7345426  | 2.80E-06 |
| CD24     | CD24 antigen (small cell lung carcinoma cluster 4 antigen)  | 216379_x_at  | 74.8943026  | 6.34E-08 |
| MALL     | mal, T-cell differentiation protein-like                    | 209373_at    | 75.07077701 | 6.96E-09 |
| LTBR     | lymphotoxin beta receptor (TNFR superfamily, member 3)      | 203005_at    | 80.00537889 | 2.02E-13 |
| CD24     | CD24 antigen (small cell lung carcinoma cluster 4 antigen)  | 266_s_at     | 82.86617221 | 2.63E-08 |
| OAS1     | 2',5'-oligoadenylate synthetase 1, 40/46kDa                 | 205552_s_at  | 88.01083109 | 7.84E-09 |
| IGFBP3   | insulin-like growth factor binding protein 3                | 210095_s_at  | 88.08326331 | 2.90E-06 |
| IFI16    | interferon, gamma-inducible protein 16                      | 206332_s_at  | 89.78885213 | 1.66E-06 |
|          |                                                             | 242037_at    | 91.31399888 | 8.55E-08 |
| LGALS3BP | lectin, galactoside-binding, soluble, 3 binding protein     | 200923_at    | 91.68115595 | 1.07E-07 |
| IGFBP3   | insulin-like growth factor binding protein 3                | 212143_s_at  | 92.3467298  | 8.30E-06 |
| KIAA1102 | KIAA1102 protein                                            | 212325_at    | 93.31526999 | 6.36E-09 |
| S100A16  | S100 calcium binding protein A16                            | 227998_at    | 96.03697605 | 3.84E-08 |
| IFI16    | interferon, gamma-inducible protein 16                      | 208966_x_at  | 102.6027702 | 8.97E-07 |
| MLPH     | melanophilin                                                | 218211_s_at  | 104.5594108 | 1.55E-14 |
| MTUS1    | mitochondrial tumor suppressor 1                            | 212096_s_at  | 104.6736829 | 3.74E-06 |
| NEDD9    | neural precursor cell expressed, developmentally down-reg   | 202149_at    | 105.7604841 | 4.36E-09 |
| KIAA1102 | KIAA1102 protein                                            | 212327_at    | 113.7305373 | 2.86E-08 |
| KIAA1102 | KIAA1102 protein                                            | 212328_at    | 117.837851  | 1.85E-09 |
| DNAJC12  | DnaJ (Hsp40) homolog, subfamily C, member 12                | 218976_at    | 134.1442363 | 3.89E-10 |
| MGST1    | microsomal glutathione S-transferase 1                      | 224918_x_at  | 177.3489846 | 5.34E-13 |
| FN1      | fibronectin 1                                               | 210495_x_at  | 178.0356735 | 6.36E-07 |
| TGFBI    | transforming growth factor, beta-induced, 68kDa             | 201506_at    | 179.7186986 | 2.02E-13 |
| MGST1    | microsomal glutathione S-transferase 1                      | 231736_x_at  | 184.8884099 | 7.30E-13 |
| FN1      | fibronectin 1                                               | 216442_x_at  | 191.3480731 | 6.65E-07 |
| MGST1    | microsomal glutathione S-transferase 1                      | 1565162_s_at | 198.3338149 | 1.11E-10 |
| FN1      | fibronectin 1 ; fibronectin 1                               | 211719_x_at  | 218.1831898 | 6.67E-07 |
| FN1      | fibronectin 1                                               | 212464_s_at  | 228.6701518 | 5.17E-07 |
| AGR2     | anterior gradient 2 homolog (Xenopus laevis)                | 209173_at    | 315.1409425 | 1.20E-07 |
| KRT19    | keratin 19                                                  | 201650_at    | 851.8034326 | 3.10E-07 |
| AKR1C3   | aldo-keto reductase family 1, member C3 (3-alpha hydroxy;   | 209160_at    | 1645.129695 | 5.23E-06 |

γ grown in 3D IrECM



Supplemental Table 4: Gene Ontology categories for 200 transcripts significantly differentially expressed ( $p < 1e-5$ ) between lung cancer cell lines showing smooth morphology vs branching morphology when g

| Category                                                                                | Genes in Category | % of Genes in Category | Genes in List in Category | % of Genes in List in Category | p-Value  |
|-----------------------------------------------------------------------------------------|-------------------|------------------------|---------------------------|--------------------------------|----------|
| GO:8629: induction of apoptosis by intracellular signals                                | 59                | 0.198                  | 8                         | 5.674                          | 3.74E-10 |
| GO:30511: positive regulation of transforming growth factor beta receptor signaling pat | 10                | 0.0336                 | 5                         | 3.546                          | 5.48E-10 |
| GO:9613: response to pest, pathogen or parasite                                         | 1084              | 3.641                  | 23                        | 16.31                          | 1.68E-09 |
| GO:43207: response to external biotic stimulus                                          | 1123              | 3.772                  | 23                        | 16.31                          | 3.28E-09 |
| GO:19048: virus-host interaction                                                        | 16                | 0.0537                 | 5                         | 3.546                          | 9.29E-09 |
| GO:6955: immune response                                                                | 1705              | 5.726                  | 27                        | 19.15                          | 2.84E-08 |
| GO:46330: positive regulation of JNK cascade                                            | 21                | 0.0705                 | 5                         | 3.546                          | 4.25E-08 |
| GO:6952: defense response                                                               | 1897              | 6.371                  | 28                        | 19.86                          | 6.63E-08 |
| GO:17015: regulation of transforming growth factor beta receptor signaling pathway      | 24                | 0.0806                 | 5                         | 3.546                          | 8.77E-08 |
| GO:9607: response to biotic stimulus                                                    | 1986              | 6.67                   | 28                        | 19.86                          | 1.71E-07 |
| GO:6953: acute-phase response                                                           | 52                | 0.175                  | 6                         | 4.255                          | 1.72E-07 |
| GO:46328: regulation of JNK cascade                                                     | 35                | 0.118                  | 5                         | 3.546                          | 6.42E-07 |
| GO:9605: response to external stimulus                                                  | 1545              | 5.189                  | 23                        | 16.31                          | 1.02E-06 |
| GO:44403: symbiosis, mutualism through parasitism                                       | 83                | 0.279                  | 6                         | 4.255                          | 2.83E-06 |
| GO:44404: symbiotic interaction between host and other organism                         | 83                | 0.279                  | 6                         | 4.255                          | 2.83E-06 |
| GO:44419: interaction between organisms                                                 | 84                | 0.282                  | 6                         | 4.255                          | 3.04E-06 |
| GO:9967: positive regulation of signal transduction                                     | 273               | 0.917                  | 9                         | 6.383                          | 6.54E-06 |
| GO:6959: humoral immune response                                                        | 339               | 1.139                  | 9                         | 6.383                          | 3.62E-05 |
| GO:9966: regulation of signal transduction                                              | 642               | 2.156                  | 12                        | 8.511                          | 5.80E-05 |
| GO:6950: response to stress                                                             | 2411              | 8.097                  | 26                        | 18.44                          | 6.08E-05 |
| GO:7179: transforming growth factor beta receptor signaling pathway                     | 92                | 0.309                  | 5                         | 3.546                          | 7.83E-05 |
| GO:8630: DNA damage response, signal transduction resulting in induction of apoptosi    | 18                | 0.0605                 | 3                         | 2.128                          | 8.05E-05 |
| GO:30330: DNA damage response, signal transduction by p53 class mediator                | 18                | 0.0605                 | 3                         | 2.128                          | 8.05E-05 |
| GO:31032: actomyosin structure organization and biogenesis                              | 19                | 0.0638                 | 3                         | 2.128                          | 9.53E-05 |
| GO:48522: positive regulation of cellular process                                       | 1516              | 5.092                  | 19                        | 13.48                          | 1.02E-04 |
| GO:43065: positive regulation of apoptosis                                              | 483               | 1.622                  | 10                        | 7.092                          | 1.07E-04 |
| GO:43068: positive regulation of programmed cell death                                  | 487               | 1.636                  | 10                        | 7.092                          | 1.14E-04 |
| GO:6928: cell motility                                                                  | 586               | 1.968                  | 11                        | 7.801                          | 1.15E-04 |
| GO:51674: localization of cell                                                          | 586               | 1.968                  | 11                        | 7.801                          | 1.15E-04 |
| GO:40011: locomotion                                                                    | 586               | 1.968                  | 11                        | 7.801                          | 1.15E-04 |
| GO:7626: locomotory behavior                                                            | 605               | 2.032                  | 11                        | 7.801                          | 1.51E-04 |
| GO:7243: protein kinase cascade                                                         | 844               | 2.835                  | 13                        | 9.22                           | 1.96E-04 |
| GO:42771: DNA damage response, signal transduction by p53 class mediator resulting      | 5                 | 0.0168                 | 2                         | 1.418                          | 2.21E-04 |
| GO:7610: behavior                                                                       | 751               | 2.522                  | 12                        | 8.511                          | 2.50E-04 |
| GO:38: very-long-chain fatty acid metabolism                                            | 6                 | 0.0202                 | 2                         | 1.418                          | 3.30E-04 |
| GO:7178: transmembrane receptor protein serine/threonine kinase signaling pathway       | 126               | 0.423                  | 5                         | 3.546                          | 3.42E-04 |
| GO:45663: positive regulation of myoblast differentiation                               | 7                 | 0.0235                 | 2                         | 1.418                          | 4.60E-04 |
| GO:7167: enzyme linked receptor protein signaling pathway                               | 585               | 1.965                  | 10                        | 7.092                          | 4.92E-04 |
| GO:16032: viral life cycle                                                              | 138               | 0.463                  | 5                         | 3.546                          | 5.19E-04 |
| GO:7254: JNK cascade                                                                    | 144               | 0.484                  | 5                         | 3.546                          | 6.30E-04 |
| GO:31098: stress-activated protein kinase signaling pathway                             | 144               | 0.484                  | 5                         | 3.546                          | 6.30E-04 |
| GO:48518: positive regulation of biological process                                     | 1763              | 5.921                  | 19                        | 13.48                          | 6.73E-04 |
| GO:6917: induction of apoptosis                                                         | 428               | 1.437                  | 8                         | 5.674                          | 0.00103  |
| GO:12502: induction of programmed cell death                                            | 428               | 1.437                  | 8                         | 5.674                          | 0.00103  |
| GO:51242: positive regulation of cellular physiological process                         | 1277              | 4.289                  | 15                        | 10.64                          | 0.0011   |
| GO:45661: regulation of myoblast differentiation                                        | 11                | 0.0369                 | 2                         | 1.418                          | 0.00119  |
| GO:6631: fatty acid metabolism                                                          | 344               | 1.155                  | 7                         | 4.965                          | 0.0013   |
| GO:43119: positive regulation of physiological process                                  | 1315              | 4.416                  | 15                        | 10.64                          | 0.00147  |
| GO:50896: response to stimulus                                                          | 4365              | 14.66                  | 34                        | 24.11                          | 0.00199  |
| GO:50874: organismal physiological process                                              | 4074              | 13.68                  | 32                        | 22.7                           | 0.00243  |
| GO:16477: cell migration                                                                | 294               | 0.987                  | 6                         | 4.255                          | 0.00284  |
| GO:42981: regulation of apoptosis                                                       | 870               | 2.922                  | 11                        | 7.801                          | 0.00293  |
| GO:43067: regulation of programmed cell death                                           | 879               | 2.952                  | 11                        | 7.801                          | 0.00317  |
| GO:1558: regulation of cell growth                                                      | 317               | 1.065                  | 6                         | 4.255                          | 0.0041   |
| GO:9312: oligosaccharide biosynthesis                                                   | 21                | 0.0705                 | 2                         | 1.418                          | 0.00441  |
| GO:9615: response to virus                                                              | 140               | 0.47                   | 4                         | 2.837                          | 0.00449  |
| GO:46399: glucuronate biosynthesis                                                      | 1                 | 0.00336                | 1                         | 0.709                          | 0.00474  |
| GO:6065: UDP-glucuronate biosynthesis                                                   | 1                 | 0.00336                | 1                         | 0.709                          | 0.00474  |
| GO:51017: actin filament bundle formation                                               | 22                | 0.0739                 | 2                         | 1.418                          | 0.00483  |
| GO:6915: apoptosis                                                                      | 1377              | 4.625                  | 14                        | 9.929                          | 0.00585  |
| GO:12501: programmed cell death                                                         | 1386              | 4.655                  | 14                        | 9.929                          | 0.00618  |
| GO:42770: DNA damage response, signal transduction                                      | 79                | 0.265                  | 3                         | 2.128                          | 0.00632  |
| GO:40008: regulation of growth                                                          | 350               | 1.175                  | 6                         | 4.255                          | 0.00658  |
| GO:6690: icosanoid metabolism                                                           | 82                | 0.275                  | 3                         | 2.128                          | 0.00701  |
| GO:30154: cell differentiation                                                          | 1285              | 4.316                  | 13                        | 9.22                           | 0.00815  |
| GO:19371: cyclooxygenase pathway                                                        | 2                 | 0.00672                | 1                         | 0.709                          | 0.00945  |
| GO:8219: cell death                                                                     | 1464              | 4.917                  | 14                        | 9.929                          | 0.00977  |
| GO:74: regulation of progression through cell cycle                                     | 1321              | 4.437                  | 13                        | 9.22                           | 0.0101   |
| GO:165: MAPKKK cascade                                                                  | 275               | 0.924                  | 5                         | 3.546                          | 0.0101   |
| GO:16265: death                                                                         | 1472              | 4.944                  | 14                        | 9.929                          | 0.0102   |
| GO:40007: growth                                                                        | 514               | 1.726                  | 7                         | 4.965                          | 0.0115   |
| GO:30224: monocyte differentiation                                                      | 35                | 0.118                  | 2                         | 1.418                          | 0.012    |
| GO:19221: cytokine and chemokine mediated signaling pathway                             | 37                | 0.124                  | 2                         | 1.418                          | 0.0133   |
| GO:122: negative regulation of transcription from RNA polymerase II promoter            | 193               | 0.648                  | 4                         | 2.837                          | 0.0136   |
| GO:6011: UDP-glucose metabolism                                                         | 3                 | 0.0101                 | 1                         | 0.709                          | 0.0141   |
| GO:6063: uronic acid metabolism                                                         | 3                 | 0.0101                 | 1                         | 0.709                          | 0.0141   |
| GO:19585: glucuronate metabolism                                                        | 3                 | 0.0101                 | 1                         | 0.709                          | 0.0141   |
| GO:46398: UDP-glucuronate metabolism                                                    | 3                 | 0.0101                 | 1                         | 0.709                          | 0.0141   |
| GO:7010: cytoskeleton organization and biogenesis                                       | 1084              | 3.641                  | 11                        | 7.801                          | 0.0142   |
| GO:9311: oligosaccharide metabolism                                                     | 40                | 0.134                  | 2                         | 1.418                          | 0.0154   |
| GO:44255: cellular lipid metabolism                                                     | 1102              | 3.701                  | 11                        | 7.801                          | 0.0159   |
| GO:7155: cell adhesion                                                                  | 1726              | 5.797                  | 15                        | 10.64                          | 0.0169   |
| GO:8361: regulation of cell size                                                        | 435               | 1.461                  | 6                         | 4.255                          | 0.0177   |
| GO:16049: cell growth                                                                   | 435               | 1.461                  | 6                         | 4.255                          | 0.0177   |
| GO:7613: memory                                                                         | 4                 | 0.0134                 | 1                         | 0.709                          | 0.0188   |
| GO:7249: I-kappaB kinase/NF-kappaB cascade                                              | 325               | 1.092                  | 5                         | 3.546                          | 0.0195   |
| GO:48534: hemopoietic or lymphoid organ development                                     | 217               | 0.729                  | 4                         | 2.837                          | 0.02     |
| GO:30097: hemopoiesis                                                                   | 217               | 0.729                  | 4                         | 2.837                          | 0.02     |
| GO:6692: prostanoid metabolism                                                          | 46                | 0.154                  | 2                         | 1.418                          | 0.0201   |
| GO:6693: prostaglandin metabolism                                                       | 46                | 0.154                  | 2                         | 1.418                          | 0.0201   |
| GO:7222: frizzled signaling pathway                                                     | 46                | 0.154                  | 2                         | 1.418                          | 0.0201   |
| GO:45892: negative regulation of transcription, DNA-dependent                           | 331               | 1.112                  | 5                         | 3.546                          | 0.0209   |
| GO:43123: positive regulation of I-kappaB kinase/NF-kappaB cascade                      | 226               | 0.759                  | 4                         | 2.837                          | 0.0228   |

|                                                                                      |      |        |    |       |        |
|--------------------------------------------------------------------------------------|------|--------|----|-------|--------|
| GO:6357: regulation of transcription from RNA polymerase II promoter                 | 869  | 2.919  | 9  | 6.383 | 0.0228 |
| GO:46456: icosanoid biosynthesis                                                     | 52   | 0.175  | 2  | 1.418 | 0.0253 |
| GO:7015: actin filament organization                                                 | 53   | 0.178  | 2  | 1.418 | 0.0262 |
| GO:45005: maintenance of fidelity during DNA-dependent DNA replication               | 54   | 0.181  | 2  | 1.418 | 0.0271 |
| GO:6298: mismatch repair                                                             | 54   | 0.181  | 2  | 1.418 | 0.0271 |
| GO:16053: organic acid biosynthesis                                                  | 137  | 0.46   | 3  | 2.128 | 0.0275 |
| GO:46394: carboxylic acid biosynthesis                                               | 137  | 0.46   | 3  | 2.128 | 0.0275 |
| GO:6122: mitochondrial electron transport, ubiquinol to cytochrome c                 | 6    | 0.0202 | 1  | 0.709 | 0.0281 |
| GO:8588: release of cytoplasmic sequestered NF-kappaB                                | 6    | 0.0202 | 1  | 0.709 | 0.0281 |
| GO:6629: lipid metabolism                                                            | 1361 | 4.571  | 12 | 8.511 | 0.0285 |
| GO:45597: positive regulation of cell differentiation                                | 56   | 0.188  | 2  | 1.418 | 0.029  |
| GO:48513: organ development                                                          | 1524 | 5.118  | 13 | 9.22  | 0.0291 |
| GO:43122: regulation of I-kappaB kinase/NF-kappaB cascade                            | 245  | 0.823  | 4  | 2.837 | 0.0294 |
| GO:6929: substrate-bound cell migration                                              | 7    | 0.0235 | 1  | 0.709 | 0.0327 |
| GO:45445: myoblast differentiation                                                   | 60   | 0.202  | 2  | 1.418 | 0.033  |
| GO:7519: striated muscle development                                                 | 149  | 0.5    | 3  | 2.128 | 0.034  |
| GO:82: G1/S transition of mitotic cell cycle                                         | 62   | 0.208  | 2  | 1.418 | 0.035  |
| GO:8283: cell proliferation                                                          | 1406 | 4.722  | 12 | 8.511 | 0.0352 |
| GO:6695: cholesterol biosynthesis                                                    | 63   | 0.212  | 2  | 1.418 | 0.036  |
| GO:31571: G1 DNA damage checkpoint                                                   | 8    | 0.0269 | 1  | 0.709 | 0.0373 |
| GO:6977: DNA damage response, signal transduction by p53 class mediator resulting in | 8    | 0.0269 | 1  | 0.709 | 0.0373 |
| GO:42692: muscle cell differentiation                                                | 68   | 0.228  | 2  | 1.418 | 0.0414 |
| GO:19369: arachidonic acid metabolism                                                | 9    | 0.0302 | 1  | 0.709 | 0.0418 |
| GO:9611: response to wounding                                                        | 823  | 2.764  | 8  | 5.674 | 0.0425 |
| GO:8217: regulation of blood pressure                                                | 70   | 0.235  | 2  | 1.418 | 0.0436 |
| GO:30099: myeloid cell differentiation                                               | 72   | 0.242  | 2  | 1.418 | 0.0459 |
| GO:46824: positive regulation of nucleocytoplasmic transport                         | 10   | 0.0336 | 1  | 0.709 | 0.0464 |
| GO:42307: positive regulation of protein import into nucleus                         | 10   | 0.0336 | 1  | 0.709 | 0.0464 |
| GO:42993: positive regulation of transcription factor import into nucleus            | 10   | 0.0336 | 1  | 0.709 | 0.0464 |
| GO:42346: positive regulation of NF-kappaB import into nucleus                       | 10   | 0.0336 | 1  | 0.709 | 0.0464 |
| GO:51222: positive regulation of protein transport                                   | 10   | 0.0336 | 1  | 0.709 | 0.0464 |
| GO:8203: cholesterol metabolism                                                      | 173  | 0.581  | 3  | 2.128 | 0.0493 |
